# Supplementary material for: Random-sequence genetic oligomer pools display an innate potential for ligation and recombination
Source: eLife. 2018 Nov 21;7:e43022. doi: 10.7554/eLife.43022 (PMC6289569; doi:10.7554/eLife.43022)
Supplement: Figure 1—figure supplement 1—source data 1. [file elife-43022-fig1-figsupp1-data1.xlsx]

## Sheet: N40
wc -l	NpN	count	experimental	expected from pre-lig	difference
206780	CG	103390	0.147369	0.0253069	0.122062
177710	UG	88855	0.126651	0.024668	0.101983
179430	CU	89715	0.127877	0.0313802	0.0964967
240590	CC	120295	0.171465	0.115677	0.055788
147624	CA	73812	0.105209	0.0643704	0.0408389
76068	GG	38034	0.0542125	0.0311681	0.0230444
32518	UU	16259	0.0231751	0.030588	-0.00741297
38350	GU	19175	0.0273314	0.0386481	-0.0113166
70662	UA	35331	0.0503597	0.0627454	-0.0123857
11518	AC	5759	0.0082087	0.025757	-0.0175483
19346	AU	9673	0.0137876	0.0319383	-0.0181507
59194	GA	29597	0.0421866	0.079279	-0.0370923
19376	AA	9688	0.013809	0.0655152	-0.0517063
59162	UC	29581	0.0421638	0.112757	-0.0705927
34660	AG	17330	0.0247016	0.117734	-0.0930324
30158	GC	15079	0.0214931	0.142468	-0.120975
1403146	total	701573

## Sheet: C1>p C4 noMg
	NpN	count	experimental	expected from pre-lig	difference			preligation frequencies
	UA	7458	0.0369788	0.0891507	-0.0521719		pos		A	C	G	T
	UC	6102	0.0302554	0.0259337	0.00432166		40	C120-N20	0.167528	0.265089	0.271204	0.296179
	UG	26408	0.130938	0.151964	-0.0210255		1	N20-C420	0.301002	0.0875609	0.51308	0.0983573
	UU	3833	0.0190051	0.0291314	-0.0101264
	CA	36670	0.18182	0.0797923	0.102028		40	C320-N20	0.238171	0.203455	0.26024	0.298134
	CC	27371	0.135713	0.0232114	0.112502		1	N20-C220	0.185701	0.154104	0.532696	0.1275
	CG	28209	0.139868	0.136012	0.00385646
	CU	14986	0.0743047	0.0260734	0.0482313
	GA	11438	0.0567128	0.0816331	-0.0249203
	GC	3233	0.0160301	0.0237469	-0.00771678
	GG	16718	0.0828925	0.139149	-0.0562569
	GU	8477	0.0420313	0.0266749	0.0153564
	AA	2522	0.0125048	0.0504262	-0.0379214
	AC	1259	0.00624247	0.0146689	-0.00842641
	AG	4694	0.0232741	0.085955	-0.0626809
	AU	2305	0.0114288	0.0164776	-0.00504875

## Sheet: C3>p C2 noMg
	NpN	count	experimental	expected from pre-lig	difference			preligation frequencies
	CA	36670	0.18182	0.0377817	0.144038		pos		A	C	G	T
	CG	28209	0.139868	0.10838	0.0314884		40	C120-N20	0.167528	0.265089	0.271204	0.296179
	CC	27371	0.135713	0.0313531	0.10436		1	N20-C420	0.301002	0.0875609	0.51308	0.0983573
	UG	26408	0.130938	0.158815	-0.0278765
	GG	16718	0.0828925	0.138629	-0.0557364		40	C320-N20	0.238171	0.203455	0.26024	0.298134
	CU	14986	0.0743047	0.0259405	0.0483642		1	N20-C220	0.185701	0.154104	0.532696	0.1275
	GA	11438	0.0567128	0.0483268	0.00838596
	GU	8477	0.0420313	0.0331806	0.00885069
	UA	7458	0.0369788	0.0553637	-0.0183848
	UC	6102	0.0302554	0.0459435	-0.0156881
	AG	4694	0.0232741	0.126873	-0.103598
	UU	3833	0.0190051	0.038012	-0.019007
	GC	3233	0.0160301	0.0401039	-0.0240738
	AU	2305	0.0114288	0.0303668	-0.0189379
	AA	2522	0.0125048	0.0442285	-0.0317237
	AC	1259	0.00624247	0.036703	-0.0304605

## Sheet: C1>p C2 noMg
	NpN	count	experimental	expected from pre-lig	difference			preligation frequencies
	CG	217688	0.181133	0.141212	0.0399214		pos		A	C	G	T
	CC	214742	0.178682	0.0408511	0.137831		40	C120-N20	0.167528	0.265089	0.271204	0.296179
	UG	124733	0.103787	0.157774	-0.0539862		1	N20-C420	0.301002	0.0875609	0.51308	0.0983573
	GG	118118	0.0982832	0.144469	-0.0461862
	CA	98785	0.0821966	0.0492271	0.0329695		40	C320-N20	0.238171	0.203455	0.26024	0.298134
	CU	95027	0.0790697	0.0337988	0.0452709		1	N20-C220	0.185701	0.154104	0.532696	0.1275
	UC	56331	0.0468717	0.0456423	0.00122938
	GU	48457	0.0403199	0.0345785	0.0057414
	AG	48270	0.0401643	0.0892413	-0.049077
	GA	45966	0.0382472	0.0503628	-0.0121156
	UA	38930	0.0323927	0.0550007	-0.022608
	GC	37774	0.0314308	0.0417935	-0.0103627
	UU	24890	0.0207104	0.0377629	-0.0170525
	AU	13407	0.0111556	0.0213598	-0.0102041
	AA	10377	0.00863445	0.03111	-0.0224756
	AC	8318	0.00692121	0.0258166	-0.0188954
		1201813

## Sheet: C1-p C2 noMg 60mer
	NpN	count	experimental	expected from pre-lig	difference			preligation frequencies
	CA	4454	0.0643019	0.0262401	0.0380618
	CC	10732	0.154937	0.0217753	0.133161		pos	N20-C220
	CG	8352	0.120577	0.0752716	0.0453053			A	C	G	U
	CU	4845	0.0699467	0.0180161	0.0519306		1	0.185701	0.154104	0.532696	0.1275
	GA	3861	0.0557408	0.0725283	-0.0167874
	GC	3262	0.0470931	0.0601875	-0.0130944			C120-N20, pos 9
	GG	8637	0.124691	0.208052	-0.0833611		9	0.192945	0.141303	0.390565	0.275187
	GU	4737	0.0683875	0.0497971	0.0185905
	UA	2400	0.0346485	0.0511024	-0.0164538
	UC	3238	0.0467466	0.0424072	0.00433941
	UG	8526	0.123089	0.146591	-0.0235019
	UU	1597	0.0230557	0.0350863	-0.0120306
	AA	747	0.0107844	0.03583	-0.0250457
	AC	578	0.00834452	0.0297335	-0.021389
	AG	2432	0.0351105	0.102781	-0.0676704
	AU	869	0.0125457	0.0246005	-0.0120548
		69267

## Sheet: prelig N20>p
	preligation N20 material, nucleotide frequencies
	pos	A	C	G	U	N	total		%A	%C	%G	%U
	20	57572	56566	69667	55138	0	238943		0.240944	0.236734	0.291563	0.230758
	1	64971	116756	25543	31673	0	238943		0.27191	0.488635	0.1069	0.132555
