# Supplementary material for: Random-sequence genetic oligomer pools display an innate potential for ligation and recombination
Source: eLife. 2018 Nov 21;7:e43022. doi: 10.7554/eLife.43022 (PMC6289569; doi:10.7554/eLife.43022)
Supplement: Figure 1—source data 1. [file elife-43022-fig1-data1.xlsx]

## Sheet: panel C
Urea-PAGE of N20>p incubation, 57 days in ice (-9°C), SYBR gold staining, base-line corrected electropherograms are from ImageQuant, integration data is avalaible in Supplementary File 1.				Size distribution of the sequenced 40mer band (no MgCl2, Nmer = length of randomer embedded between sequencing adapters)
				Nmer	# sequences
y-position on gel (pixel)	no MgCl2	10 mM MgCl2		0	92618
1	0	0		1	4307
2	6.905	0		2	5008
3	7.023	0		3	3802
4	6.353	17.78		4	3730
5	8.929	24.965		5	3911
6	26.153	16.488		6	3895
7	5.061	72.379		7	4496
8	0	154.815		8	5190
9	0.129	143.982		9	5883
10	0	213.874		10	6735
11	0	75.298		11	5499
12	0	39.115		12	4166
13	0	23.062		13	3750
14	0	5.443		14	3225
15	0	6.338		15	5433
16	0.911	0		16	4092
17	41.494	0		17	3099
18	87.32	0		18	3145
19	205.861	0		19	3971
20	164.919	2.421		20	27263
21	138.26	38.476		21	1040
22	97.64	0		22	1278
23	81.972	0		23	1315
24	137.958	39.071		24	1341
25	195.279	37.548		25	1593
26	58.992	0		26	1727
27	22.531	0		27	2045
28	37.303	0		28	2455
29	40.871	0		29	2506
30	33.755	0		30	2164
31	43.93	0		31	1297
32	33.67	0		32	1227
33	42.874	0		33	1395
34	36.882	0		34	1862
35	37.577	11.212		35	3170
36	45.111	22.973		36	7431
37	42.465	45.948		37	21823
38	56.911	71.679		38	57415
39	57.052	89.732		39	101694
40	65.817	87.743		40	730406
41	55.746	43.996		41	14127
42	45.534	15.259		42	2091
43	40.999	46.749		43	847
44	37.337	151.158		44	353
45	34.005	0		45	232
46	40.215	0		46	175
47	24.221	0		47	153
48	19.683	0		48	167
49	15.944	0		49	164
50	23.659	0		50	139
51	24.076	0
52	18.086	0
53	0	0
54	0	0
55	0	0
56	0	0
57	0	0
58	0	0
59	0	0
60	0	0
61	0	0
62	0	0
63	0	0
64	0	0
65	0	0
66	13.756	0
67	2.652	0
68	0	0
69	0	0
70	1.998	0
71	8.523	0
72	6.162	0
73	3.506	0
74	2.984	0
75	1.724	0
76	0.08	0
77	0	0
78	2.09	0
79	6.319	0
80	42.828	0
81	46.029	0
82	46.086	0
83	47.409	0
84	54.421	0
85	63.905	0
86	57.073	0
87	66.054	0
88	72.041	0
89	69.697	0
90	70.605	0
91	71.749	0
92	70.354	0
93	68.254	0
94	69.629	0
95	67.363	0
96	67.226	0
97	69.845	0
98	61.341	0
99	62.331	0
100	57.282	0
101	94.862	0
102	46.875	0
103	50.443	0
104	65.624	0
105	63.241	0
106	71.123	0
107	83.844	0
108	99.925	19.772
109	72.725	0
110	73.854	0
111	81.342	0
112	74.34	0
113	71.779	0
114	61.084	0
115	59.589	0
116	55.379	0
117	48.575	130.072
118	54.018	410.689
119	52.46	325.233
120	48.811	46.185
121	47.861	0
122	55.61	0
123	52.648	12.716
124	55.751	0
125	55.896	0
126	49.609	0
127	35.201	0
128	35.472	0
129	40.722	0
130	48.922	0
131	52.018	0
132	45.201	0
133	54.819	0
134	69.968	0
135	69.064	0
136	61.306	0
137	67.364	0
138	78.888	0
139	83.251	0
140	90.368	0
141	102.522	0
142	88.572	0
143	73.716	0
144	107.67	0
145	131.008	0
146	100.752	3.434
147	70.769	6.901
148	68.979	12.561
149	58.504	12.052
150	54.952	9.384
151	54.018	12.889
152	63.649	8.381
153	73.018	4.291
154	81.691	2.494
155	79.037	6.065
156	64.513	33.396
157	62.319	15.952
158	52.927	6.891
159	56.72	11.058
160	74.74	17.912
161	78.729	20.9
162	80.846	11.726
163	80.188	0
164	80.686	0
165	79.51	0
166	84.058	6.044
167	80.772	0
168	69.264	2.977
169	68.247	0.803
170	71.563	0
171	70.355	0
172	73.377	0
173	75.888	0
174	65.632	0
175	69.826	0
176	67.154	0
177	61.995	0
178	66.706	0
179	75.581	0
180	69.898	0
181	61.453	0
182	60.795	0
183	63.391	0
184	78.532	0
185	100.714	0
186	98.65	0
187	93.682	0
188	96.707	0
189	95.98	0
190	93.195	0
191	94.613	0
192	97.263	0
193	103.338	0
194	113.638	0
195	109.303	0
196	110.077	0
197	115.909	0
198	124.719	0
199	130.582	24.422
200	126.637	1.772
201	121.304	26.78
202	118.781	63.14
203	120.048	19.529
204	123.773	4.196
205	123.177	1.449
206	114.685	10.021
207	110.606	16.98
208	98.911	0
209	92.107	3.049
210	85.837	0
211	92.899	0
212	93.23	0
213	99.76	0
214	105.076	0
215	104.421	0
216	99.792	0
217	88.483	10.483
218	84.799	0
219	81.783	0
220	77.878	0
221	70.904	0
222	68.698	0
223	64.43	0
224	65.911	0
225	66.45	0
226	69.301	0
227	67.689	0
228	66.382	0
229	55.803	0
230	74.848	0
231	70.84	0
232	68.817	0
233	47.794	0
234	49.103	0
235	46.339	0
236	37.029	0
237	33.648	0
238	31.624	0
239	31.169	0
240	32.779	0
241	27.701	0
242	28.201	0
243	32.392	0
244	35.871	0
245	32.916	0
246	28.08	0
247	28.193	0
248	35.032	0
249	33.62	0
250	31.777	0
251	30.162	0
252	29.002	1.17
253	30.274	143.192
254	48.184	106.403
255	45.818	55.091
256	35.686	59.789
257	33.131	71.024
258	38.663	46.852
259	34.371	2.281
260	34.128	0
261	31.123	0
262	29.415	0
263	18.533	0
264	10.311	0
265	7.304	0
266	6.599	0
267	2.924	0
268	1.647	0
269	0.42	0
270	0	0
271	0	0
272	0	0
273	0	0
274	0	0
275	0	0
276	1.621	0
277	0	0
278	0	5.343
279	0	0
280	0	0
281	0	0
282	0.082	0
283	1.77	7.581
284	2.505	12.906
285	6.541	0
286	8.398	0
287	4.05	4.663
288	2.111	3.446
289	6.66	0
290	8.331	0
291	3.534	0
292	3.361	0
293	16.704	0
294	90.448	1.882
295	98.459	0
296	61.905	3.217
297	38.661	2.197
298	6.296	1.271
299	45.311	0
300	13.744	2.822
301	0.855	4.574
302	0.791	4.883
303	0.411	5.281
304	2.663	4.583
305	3.058	1.751
306	2.276	3.776
307	0	3.107
308	0	1.2
309	0	0
310	0	0
311	0	1.842
312	0	0.762
313	0.951	1.144
314	0.54	6.462
315	0	17.632
316	0	13.711
317	0	9.274
318	0.213	12.981
319	0	14.349
320	1.041	22.004
321	0	18.738
322	0.867	14.866
323	12.838	21.203
324	20.479	20.44
325	24.591	22.267
326	26.74	29.332
327	27.099	36.823
328	34.452	32.881
329	44.056	39.253
330	43.773	41.855
331	47.298	25.656
332	45.227	30.295
333	42.351	47.768
334	48.197	42.377
335	51.632	40.707
336	55.762	47.075
337	53.544	49.942
338	50.663	50.933
339	56.345	50.471
340	64.214	49.272
341	69.332	47.181
342	74.39	41.564
343	77.604	47.251
344	78.948	36.295
345	72.348	30.528
346	69.042	26.394
347	71.838	23.218
348	70.545	20.932
349	67.757	20.533
350	70.368	15.951
351	68.402	12.324
352	65.712	6.008
353	66.442	7.659
354	87.723	16.606
355	53.518	7.149
356	33.084	12.146
357	25.826	33.792
358	31.169	0.122
359	42.017	0
360	34.036	0
361	28.28	0
362	28.832	0
363	29.374	0
364	30.227	0
365	34.691	0
366	37.35	0
367	38.367	0
368	33.352	0
369	31.89	0
370	30.317	0
371	32.059	0
372	36.232	0
373	40.31	0
374	40.306	0
375	35.82	0
376	33.566	0
377	28.719	0
378	24.654	0
379	22.005	0
380	24.648	0
381	21.465	0
382	19.05	0
383	18.688	0
384	24.14	0
385	24.614	0
386	28.6	0
387	39.343	0
388	57.796	0
389	25.651	0
390	22.541	0
391	21.829	0
392	16.989	0
393	14.842	0
394	16.238	0
395	17.554	0
396	14.677	0
397	18.799	0.205
398	18.512	0
399	17.676	0
400	16.282	0
401	11.214	0
402	7.207	0
403	8.99	0
404	16.856	0
405	35.032	0
406	22.682	0
407	23.096	0
408	27.011	0
409	21.929	0
410	19.965	0
411	15.594	0
412	17.148	0
413	19.264	8.432
414	21.961	40.927
415	20.817	23.779
416	38.066	31.499
417	26.434	39.279
418	24.394	60.565
419	30.457	76.343
420	44.509	95.507
421	31.459	120.933
422	36.243	147.372
423	36.074	181.212
424	37.695	203.874
425	43.016	234.527
426	49.698	269.761
427	56.866	304.751
428	63.728	344.798
429	73.526	393.321
430	84.379	438.258
431	93.978	484.896
432	108.939	533.92
433	118.184	576.611
434	131.763	615.32
435	149.606	640.117
436	166.364	675.231
437	184.611	701.893
438	205.633	709.912
439	226.811	711.734
440	249.53	706.855
441	268.592	695.075
442	286.888	677.617
443	310.164	652.005
444	326.895	621.323
445	341.754	593.03
446	356.739	558.578
447	369.855	519.577
448	380.166	474.92
449	382.929	436.85
450	380.357	405.649
451	377.431	372.139
452	369.128	336.146
453	359.212	313.201
454	341.348	293.92
455	324.434	270.446
456	310.27	243.098
457	289.961	223.522
458	265.273	211.175
459	236.721	196.747
460	218.2	186.457
461	200.02	185.708
462	179.9	191.92
463	162.695	169.332
464	160.655	176.278
465	151.183	243.242
466	128.571	173.258
467	118.229	155.839
468	110.585	141.422
469	110.18	135.233
470	97.794	131.417
471	92.783	133.092
472	89.456	127.056
473	89.632	119.788
474	85.467	113.735
475	89.005	110.589
476	79.619	105.267
477	75.367	105.727
478	64.828	104.395
479	61.577	99.724
480	60.556	98.409
481	60.126	91.003
482	59.897	89.929
483	62.929	84.21
484	71.182	80.275
485	71.984	88.498
486	64.875	97.399
487	55.497	214.047
488	54.282	448.807
489	51.359	81.91
490	50.033	64.158
491	48.003	145.486
492	42.386	89.335
493	43.526	62.338
494	42.431	49.335
495	52.216	48.695
496	75.167	44.333
497	86.468	39.529
498	80	63.634
499	44.802	32.866
500	18.989	29.632
501	15.939	29.408
502	6.378	26.612
503	2.867	26.007
504	3.421	21.069
505	9.487	16.258
506	0	19.462
507	0	18.077
508	0	13.035
509	0	10.919
510	0	9.153
511	0	8.229
512	0	7.89
513	0	6.505
514	0	4.941
515	0	6.159
516	0	9.102
517	0	5.224
518	0	20.316
519	0	89.843
520	0	5.47
521	0	7.925
522	0	3.271
523	0	2.881
524	0	0
525	0	0
526	0	0
527	0	5.747
528	21.89	15.185
529	516.231	35.712
530	16.508	38.359
531	0	37.649
532	0	29.516
533	0	27.241
534	33.84	30.771
535	60.011	25.915
536	0	21.092
537	0	22.572
538	0	31.053
539	0	22.228
540	0	23.226
541	0	22.171
542	0	15.541
543	0	10.907
544	0	5.587
545	0	4.618
546	0	8.791
547	0	9.386
548	0	75.449
549	0	78.573
550	0.392	3.949
551	15.326	0
552	5.296	1.323
553	0.331	13.525
554	3.237	0
555	4.395	0
556	5.989	0
557	5.492	0
558	4.9	0
559	0	0
560	0	0
561	0	0
562	0	0
563	2.036	0
564	0	0
565	0	0
566	0	0
567	0	0
568	0	0
569	0	0
570	0	0
571	0	0
572	0	358.695
573	0	265.404
574	0	91.052
575	0	98.504
576	0	59.65
577	0	144.496
578	0.969	175.889
579	7.826	160.64
580	13.158	118.544
581	18.308	137.681
582	28.387	178.818
583	38.35	218.828
584	45.206	267.199
585	51.557	320.164
586	62.206	389.608
587	76.059	588.848
588	92.673	539.843
589	113.993	607.257
590	137.286	686.563
591	160.456	758.909
592	183.589	853.077
593	212.104	975.702
594	247.557	1082.5
595	284.135	1290.66
596	328.665	1371.2
597	431.352	1466.83
598	667.147	1611.57
599	728.558	1771.33
600	628.484	1939.75
601	622.246	2114.88
602	678.794	2306.15
603	750.499	2498.19
604	830.674	2706.4
605	924.482	2918.31
606	1016.75	3111.04
607	1117.66	3305.37
608	1227.83	3493.24
609	1352.58	3675.28
610	1477.76	3851.41
611	1614.23	4011.77
612	1757.21	4150.18
613	1908.59	4272.65
614	2071.96	4351.43
615	2238.72	4405.52
616	2410.63	4434.44
617	2584.94	4440.34
618	2760.79	4411.49
619	2941.66	4363.85
620	3124.26	4266.2
621	3298.13	4155.32
622	3456.65	4028.33
623	3612.49	3891.66
624	3750.58	3715.33
625	3873.75	3538.51
626	3978.33	3351.89
627	4045.42	3163.65
628	4086.99	2966.45
629	4089.11	2763.89
630	4066.41	2562.88
631	4019.31	2354.61
632	3932.53	2141.47
633	3829.43	1948.42
634	3698.23	1784.99
635	3546.5	1632.4
636	3390.16	1465.43
637	3215.05	1326.39
638	3018.8	1199.38
639	2822.61	1077.15
640	2634.61	967.134
641	2464.72	873.907
642	2252.94	793.168
643	2064.66	758.214
644	1863.77	673.25
645	1693.35	610.898
646	1535.77	587.856
647	1403.51	577.444
648	1246.11	504.79
649	1105.95	443.16
650	982.454	419.234
651	872.157	393.653
652	780.708	386.984
653	696.94	388.387
654	626.988	360.161
655	571.5	330.511
656	496.707	320.882
657	445.181	308.85
658	397.932	310.269
659	358.784	272.463
660	330.591	259.741
661	300.25	253.097
662	278.807	240.759
663	258.119	229.1
664	233.901	207.322
665	215.881	220.772
666	205.014	316.847
667	183.043	230.125
668	170.91	139.129
669	173.596	125.264
670	163.013	128.318
671	141.071	120.04
672	176.013	113.403
673	209.791	112.903
674	128.486	101.71
675	92.771	59.382
676	74.575	40.012
677	55.629	54.442
678	44.293	177.607
679	43.609	234.346
680	142.629	114.468
681	98.782	65.425
682	14.605	412.243
683	3.461	390.991
684	0	100.155
685	0	14.731
686	0	24.24
687	0	18.074
688	0	12.819
689	0	103.824
690	0	262.609
691	0	115.334
692	0	0
693	10.419	0
694	54.07	0
695	218.838	0
696	189.057	0
697	101.079	0
698	54.1	0
699	51.547	0
700	22.417	0
701	69.712	0
702	83.459	0
703	22.463	0
704	2.867	0
705	0	0
706	0	0
707	0	0
708	0	0
709	0	0
710	0	0
711	0	0
712	0	0
713	0	28.069
714	0	26.139
715	311.108	130.932
716	334.991	8.078
717	101.694	0
718	0	0
719	0	0
720	0	0
721	0	110.349
722	0	43.017
723	0	0
724	0	0
725	0	0
726	0	0
727	0	0
728	0	0
729	33.253	0
730	10.341	0
731	0	0
732	0	0
733	96.294	0
734	0	19.21
735	0	242.755
736	0	26.481
737	171.685	18.74
738	148.718	0
739	0	4.353
740	0	0
741	0	0
742	0	0
743	0	0
744	0	0
745	0	0
746	0	0
747	0	0
748	0	0
749	0	0
750	77.182	0
751	157.761	1.621
752	0	0
753	0	0
754	0	0
755	0	0
756	0	0
757	0	0
758	0	0
759	0	0
760	0	0
761	0	0
762	0	0
763	0	0
764	0	0
765	0	0
766	0	0
767	0	0
768	0	0
769	0	0
770	0	0
771	0	0
772	0	0
773	0	0
774	0	0
775	0	0
776	0	0
777	0	0
778	0	0
779	68.183	0
780	138.972	0
781	0	0
782	0	0
783	0	0
784	0	0
785	0	0
786	0	0
787	0	13.869
788	0	0
789	0	0
790	0	0
791	0	0
792	0	0
793	0	0
794	82.543	0
795	0	0
796	0	45.625
797	0	89.144
798	0	0
799	0	0
800	0	0
801	0	0
802	0	0
803	0	0
804	0	0
805	0	0
806	0	38.666
807	0	0
808	0	0
809	0	163.689
810	0	175.22
811	0	166.4
812	50.638	58.828
813	55.75	0
814	175.558	0
815	63.18	0
816	0	0
817	15.365	0
818	131.964	0
819	68.868	72.069
820	20.415	98.709
821	458.042	0
822	13.902	0
823	0	0
824	0	0
825	37.693	0
826	141.49	0
827	60.421	0
828	0	0
829	0	0
830	0	0
831	79.829	0
832	0	0
833	0	0
834	0	9.367
835	44.824	139.526
836	210.944	0
837	147.851	0
838	31.211	0
839	0	0
840	166.648	0
841	21.166	0
842	258.32	0
843	0	0
844	0	0
845	0	0
846	0	0
847	0	0
848	0	0
849	55.859	0
850	332.572	30.827
851	6.557	23.731
852	0	0
853	0	0
854	0	0
855	0	0
856	17.247	0
857	181.986	0
858	115.73	0
859	13.863	0
860	0	0
861	0	0
862	0	0
863	0	0
864	0	0
865	0	0
866	0	0
867	0	0
868	128.365	0
869	140.861	0
870	205.348	0
871	164.551	0
872	63.132	0
873	1.301	0
874	23.909	0
875	61.707	0
876	117.375	0
877	155.868	0
878	109.791	0
879	41.04	0
880	57.015	0
881	59.706	0
882	28.629	0
883	14.294	0
884	10.536	0
885	5.553	0
886	7.524	0
887	13.576	0
888	11.662	0
889	11.527	0
890	49.107	0
891	28.396	0
892	74.749	93.097
893	107.906	89.746
894	46.222	0
895	46.051	0
896	56.719	0
897	64.194	0
898	73.066	0
899	83.114	14.214
900	96.977	0
901	115.495	0
902	242.501	0
903	213.209	1.871
904	149.001	40.878
905	174.496	55.362
906	228.789	43.82
907	394.921	32.659
908	232.257	42.236
909	257.656	64.009
910	253.094	112.507
911	283.217	77.051
912	303.047	82.035
913	277.975	86.002
914	293.279	84.63
915	335.158	89.221
916	345.36	93.274
917	422.811	101.104
918	490.729	143.146
919	465.42	144.263
920	449.587	233.324
921	462.721	226.471
922	500.244	147.569
923	603.496	91.891
924	678.788	79.294
925	682.373	74.699
926	691.619	70.123
927	760.244	65.169
928	686.206	61.709
929	781.517	61.471
930	708.136	59.482
931	733.385	61.584
932	704.778	60.475
933	679.393	65.391
934	665.141	72.008
935	671.601	69.051
936	682.019	82.888
937	674.153	98.026
938	673.727	116.426
939	678.206	125.451
940	695.036	141.099
941	694.886	151.46
942	667.374	168.663
943	665.521	190.545
944	670.694	232.256
945	668.749	271.134
946	669.828	290.487
947	676.149	322.325
948	683.667	291.424
949	689.011	313.122
950	696	328.182
951	708.231	345.09
952	742.41	375.028
953	756.683	390.915
954	762.006	402.336
955	789.743	418.757
956	819.124	439.849
957	847.442	464.584
958	883.071	482.538
959	916.547	519.732
960	944.094	605.235
961	976.544	587.009
962	1009.48	559.742
963	1044.66	576.034
964	1079.45	590.09
965	1111.36	623.765
966	1146.84	635.742
967	1176.78	657.544
968	1212.08	686.326
969	1245.56	730.219
970	1271.55	809.68
971	1298.02	792.017
972	1323.79	813.186
973	1351.37	846.778
974	1384.59	908.455
975	1430.55	953.37
976	1440.56	1006.54
977	1469.51	1042.79
978	1471.04	1084.76
979	1490.4	1135.55
980	1515.44	1189.44
981	1536.61	1253.67
982	1561.92	1343.4
983	1594.42	1590.32
984	1670.78	1623
985	1662.06	1546.46
986	1691.43	1617.22
987	1735.72	1687.06
988	1781.86	1767.36
989	1826.84	1881.71
990	1881.66	1963.02
991	1940.15	2027.48
992	2005.35	2128.64
993	2078.72	2338.64
994	2159.34	2357.02
995	2231.31	2430.01
996	2335.73	2527.48
997	2410.09	2646.43
998	2488.12	2879.01
999	2560.12	2994.44
1000	2653.29	3082.64
1001	2751.23	3124.2
1002	2835.39	3245.79
1003	2933.18	3377.16
1004	3035.51	3528.17
1005	3144.68	3724.76
1006	3243.48	3819.92
1007	3346.92	3926.87
1008	3446.22	4085.5
1009	3560.11	4229.44
1010	3674.28	4323.83
1011	3794.49	4466.56
1012	3919.26	4643.64
1013	4053.5	4743.71
1014	4196.16	4897.99
1015	4347.63	5015.52
1016	4496.12	5129.32
1017	4650.97	5231.95
1018	4826.36	5396.4
1019	5053.76	5460.67
1020	5151.32	5540.76
1021	5324.17	5665.35
1022	5485.89	5702.68
1023	5649.56	5781.75
1024	5823.3	5873.12
1025	5984.3	5943.96
1026	6128.43	5954.3
1027	6268.18	5992.23
1028	6389.57	6022.43
1029	6496.04	6056.52
1030	6597.44	6080.37
1031	6704.59	6096.04
1032	6790.78	6125.78
1033	6859.88	6119.76
1034	6928.18	6113.4
1035	6986.87	6043.42
1036	7007.52	5963.2
1037	7033.61	5918.29
1038	7061.28	5888.07
1039	7079.96	5775.64
1040	7077.85	5863.67
1041	7073.08	5577.47
1042	7043.07	5422.49
1043	7035.73	5304.38
1044	7008.77	5223.15
1045	6985.81	5058.06
1046	6949.26	4926.29
1047	6910.45	4777.87
1048	6858.4	4613.9
1049	6801.27	4472.07
1050	6737.75	4380.93
1051	6661.47	4206.86
1052	6570.85	4028.41
1053	6480.63	3841.53
1054	6385.47	3698.65
1055	6278.31	3565.3
1056	6160.8	3465.4
1057	6036.96	3282.19
1058	5898.88	3154.46
1059	5749.51	3023.09
1060	5613.16	2912.4
1061	5438.99	2789.87
1062	5216.89	2705.3
1063	5014.58	2642.12
1064	4796.35	2480.05
1065	4593.06	2379.53
1066	4361.31	2288.55
1067	4149.74	2193.6
1068	3945.32	2131.87
1069	3733.11	2057.17
1070	3523.69	2124.53
1071	3330.1	2037.18
1072	3141.84	1864.49
1073	2968.63	1788.39
1074	2808.3	1734.72
1075	2654.38	1751.19
1076	2509.41	1802.81
1077	2375.6	1546.04
1078	2253.03	1446.94
1079	2140.03	1436.4
1080	2037.12	1353.38
1081	1936.79	1315.21
1082	1844.96	1331.92
1083	1759.99	1358.84
1084	1680.98	1181.06
1085	1601.11	1113.08
1086	1528.36	1064.88
1087	1475.24	1023.76
1088	1428.94	1009.5
1089	1345.12	999.496
1090	1324.87	970.497
1091	1260.67	945.135
1092	1176.4	933.4
1093	1118.44	908.341
1094	1075.32	927.727
1095	1038.25	949.261
1096	1003.2	936.385
1097	982.626	908.136
1098	986.92	889.149
1099	938.58	865.212
1100	928.849	789.735
1101	916.971	741.496
1102	893.621	729.887
1103	884.653	712.135
1104	873.122	699.786
1105	862.65	675.258
1106	852.631	648.092
1107	848.445	632.295
1108	846.727	613.494
1109	840.572	595.771
1110	865.223	579.429
1111	863.302	566.158
1112	852.759	549.792
1113	820.294	533.174
1114	846.379	525.598
1115	865.158	516
1116	800.668	509.509
1117	787.781	503.184
1118	778.081	497.056
1119	769.661	500.883
1120	768.954	493.005
1121	751.055	493.708
1122	716.678	497.808
1123	704.259	501.056
1124	696.329	513.048
1125	679.463	568.839
1126	667.428	543.261
1127	656.862	537.442
1128	655.251	530.774
1129	664.471	547.495
1130	642.384	528.561
1131	633.999	574.309
1132	635.026	575.907
1133	644.235	552.433
1134	636.443	542.609
1135	638.366	549.192
1136	639.14	534.885
1137	650.867	533.73
1138	661.672	528.182
1139	665.904	517.295
1140	674.086	534.304
1141	729.972	555.727
1142	796.264	556.352
1143	727.576	552.21
1144	726.292	489.202
1145	706.074	468.008
1146	756.308	451.948
1147	731.125	437.837
1148	708.379	419.198
1149	778.227	409.993
1150	779.537	425.04
1151	778.994	425.149
1152	831.091	389.859
1153	761.977	441.356
1154	717.315	417.585
1155	660.18	472.653
1156	645.871	362.541
1157	654.996	374.832
1158	618.778	446.64
1159	587.991	470.257
1160	583.755	445.599
1161	622.686	378.391
1162	693.228	377.309
1163	588.422	382.158
1164	537.322	384.141
1165	513.597	386.338
1166	503.247	393.98
1167	496.448	404.641
1168	490.211	426.3
1169	490.554	441.066
1170	498.288	460.625
1171	484.853	460.314
1172	489.192	458.102
1173	496.304	481.566
1174	505.142	460.637
1175	512.376	446.775
1176	518.618	448.337
1177	527.195	446.102
1178	525.354	434.744
1179	531.093	428.851
1180	535.439	490.197
1181	544.022	500.469
1182	559.631	417.432
1183	594.681	387.282
1184	580.399	373.303
1185	554.802	358.512
1186	554.461	348.841
1187	554.316	348.368
1188	549.754	337.04
1189	538.361	313.882
1190	533.548	299.942
1191	542.599	292.51
1192	558.591	286.104
1193	543.264	289.348
1194	502.534	285.153
1195	492.502	284.927
1196	513.292	263.928
1197	497.131	261.967
1198	500.325	275.367
1199	463.647	242.579
1200	468.798	242.501
1201	420.906	256.005
1202	404.389	264.287
1203	407.602	274.604
1204	386.359	270.238
1205	380.611	271.135
1206	373.474	279.103
1207	376.141	282.527
1208	373.471	288.254
1209	371.358	293.85
1210	370.912	301.409
1211	372.177	305.377
1212	374.854	305.284
1213	383.544	310.528
1214	397.095	306.886
1215	427.144	300.489
1216	401.371	315.57
1217	402.175	348.3
1218	406.931	316.799
1219	409.312	284.304
1220	416.317	269.052
1221	422.712	260.548
1222	422.268	268.201
1223	485.422	238.544
1224	422.745	217.596
1225	428.905	201.771
1226	435.084	190.406
1227	425.284	192.436
1228	392.928	210.989
1229	384.124	166.314
1230	407.338	154.754
1231	417.505	183.948
1232	354.157	154.054
1233	338.135	136.965
1234	326.964	145.965
1235	312.393	160.347
1236	319.526	121.138
1237	303.973	118.448
1238	280.686	122.545
1239	286.645	131.002
1240	343.424	138.171
1241	255.337	156.562
1242	245.674	151.531
1243	248.488	153.895
1244	244.157	177.942
1245	238.87	182.646
1246	237.93	210.796
1247	238.977	209.127
1248	248.226	209.774
1249	261.005	207.76
1250	257.325	194.771
1251	255.838	193.638
1252	261.183	195.052
1253	272.648	195.038
1254	284.479	192.084
1255	286.934	184.786
1256	309.259	179.271
1257	302.224	173.985
1258	305.152	175.055
1259	311.208	171.228
1260	320.488	187.429
1261	322.312	215.876
1262	330.36	212.371
1263	365.082	142.737
1264	467.219	156.327
1265	610.233	119.379
1266	522.931	96.713
1267	326.719	73.954
1268	306.935	54.6
1269	282.238	44.006
1270	266.288	55.511
1271	265.178	40.697
1272	249.247	41.609
1273	224.685	44.94
1274	210.957	83.182
1275	198.757	161.884
1276	188.77	89.607
1277	178.149	8.245
1278	162.356	0
1279	163.134	2.044
1280	148.045	15.378
1281	155.974	4.589
1282	152.176	4.506
1283	140.342	4.263
1284	196.458	4.388
1285	220.025	5.797
1286	270.192	7.087
1287	182.175	9.685
1288	134.666	19.932
1289	192.286	39.115
1290	131.057	30.433
1291	114.552	52.092
1292	110.433	38.193
1293	119.589	24.955
1294	119.8	150.879
1295	116.483	33.673
1296	126.916	0
1297	134.716	0
1298	131.462	0
1299	121.597	0
1300	106.115	0
1301	108.377	0
1302	106.454	0
1303	99.456	43.024
1304	91.157	0
1305	87.797	0
1306	76.581	0
1307	71.77	162.548
1308	65.287	0
1309	58.162	0
1310	53.161	0
1311	47.235	0
1312	42.741	0
1313	34.182	0
1314	36.965	0
1315	27.572	0
1316	8.401	0
1317	9.847	0
1318	5.25	0
1319	0	0
1320	0	0
1321	0	0
1322	20.526	0
1323	1.454	0
1324	0	0
1325	0	136.541
1326	0	156.704
1327	0	178.257
1328	0	291.922
1329	0	176.74
1330	0	31.831
1331	0	0
1332	0	0
1333	0	0
1334	0	0
1335	0	0
1336	20.644	66.495
1337	87.037	44.676
1338	8.935	0
1339	2.839	0
1340	0.594	0
1341	4.199	0
1342	0	0
1343	0	0
1344	0	0
1345	0	0
1346	0	0
1347	0	0
1348	8.724	0
1349	0	0
1350	0	0
1351	0	0
1352	0	0
1353	0	0
1354	0	0
1355	0	0
1356	0	0
1357	0	0
1358	222.753	0
1359	79.885	0
1360	0	0
1361	0	0
1362	0	0
1363	0	97.183
1364	0	50.007
1365	0	0
1366	0	110.979
1367	0	7.259
1368	0	0
1369	0	5.485
1370	0	80.493
1371	0	76.949
1372	0	0
1373	0	0
1374	0	20.438
1375	0	74.835
1376	0	45.638
1377	0	1.632
1378	0	23.109
1379	0	0
1380	56.243	0
1381	0	0
1382	0	0
1383	0	108.658
1384	0	150.538
1385	0	135.418
1386	0	168.482
1387	0	427.807
1388	0	251.738
1389	0	156.693
1390	0	199.147
1391	0	45.765
1392	0	67.029
1393	0	8.152
1394	0	11.662
1395	0	71.076
1396	0	26.435
1397	0	5.462
1398	0	23.921
1399	0	21.571
1400	0	20.262
1401	0	18.921
1402	0	59.837
1403	0	42.129
1404	0	43.634
1405	0	26.55
1406	0	28.08
1407	0	87.611
1408	0	148.852
1409	0	199.683
1410	0	175.744
1411	0	260.467
1412	0	395.423
		521.576
		619.052

## Sheet: panel D
nucleotide frequencies
													difference plot
	N40 product					N20>p starting material							N40 product - 2xN20>p starting material
position	A	C	G	U		position	A	C	G	U		position	DA	DC	DG	DU
1	0.288535	0.439869	0.108649	0.162946		1	0.27191	0.488635	0.1069	0.132555		1	0.0166254	-0.0487663	0.00174919	0.0303917
2	0.333853	0.149541	0.191135	0.325471		2	0.323868	0.16018	0.180453	0.335498		2	0.00998464	-0.010639	0.0106817	-0.0100274
3	0.288474	0.16078	0.277728	0.273018		3	0.275635	0.159243	0.260589	0.304533		3	0.012839	0.00153744	0.0171384	-0.0315149
4	0.26751	0.178105	0.323631	0.230754		4	0.262556	0.157402	0.332912	0.24713		4	0.00495378	0.0207035	-0.00928107	-0.0163762
5	0.226393	0.19505	0.379692	0.198865		5	0.20784	0.167191	0.43733	0.187639		5	0.0185529	0.0278599	-0.0576387	0.0112258
6	0.212951	0.230157	0.349395	0.207497		6	0.190163	0.218228	0.400049	0.19156		6	0.0227889	0.0119291	-0.0506547	0.0159366
7	0.215314	0.251225	0.30603	0.227431		7	0.194109	0.261539	0.325705	0.218646		7	0.0212054	-0.0103147	-0.0196755	0.00878476
8	0.218099	0.241036	0.30448	0.236385		8	0.20653	0.243769	0.318695	0.231005		8	0.0115688	-0.00273363	-0.0142153	0.00538009
9	0.225373	0.247607	0.301794	0.225225		9	0.219094	0.250386	0.317611	0.212909		9	0.00627919	-0.00277858	-0.0158175	0.0123169
10	0.237749	0.24818	0.291584	0.222487		10	0.230159	0.26061	0.300967	0.208263		10	0.0075891	-0.0124305	-0.00938277	0.0142242
11	0.248667	0.239897	0.288603	0.222834		11	0.240765	0.255542	0.293982	0.209711		11	0.00790265	-0.0156454	-0.00537974	0.0131225
12	0.259932	0.232816	0.281987	0.225265		12	0.248879	0.251713	0.284239	0.215168		12	0.0110527	-0.018897	-0.00225233	0.0100967
13	0.266272	0.224852	0.282954	0.225922		13	0.255961	0.237956	0.281393	0.22469		13	0.0103118	-0.0131047	0.00156012	0.00123272
14	0.266711	0.219231	0.28817	0.225888		14	0.262966	0.224526	0.284168	0.228339		14	0.00374409	-0.00529486	0.00400168	-0.00245091
15	0.263213	0.221406	0.287769	0.227613		15	0.270236	0.21154	0.292082	0.226142		15	-0.00702348	0.00986564	-0.00431349	0.00147134
16	0.254809	0.215238	0.295537	0.234416		16	0.267419	0.195683	0.30172	0.235177		16	-0.0126105	0.0195552	-0.00618349	-0.000761226
17	0.241076	0.219915	0.289002	0.250008		17	0.269889	0.193607	0.310677	0.225828		17	-0.0288131	0.0263078	-0.0216743	0.0241796
18	0.217333	0.217435	0.318853	0.246379		18	0.300875	0.16527	0.341521	0.192335		18	-0.0835426	0.0521657	-0.022668	0.0540448
19	0.14688	0.253148	0.296004	0.303968		19	0.202956	0.265247	0.314284	0.217512		19	-0.0560764	-0.0120991	-0.0182803	0.0864558
20	0.0604267	0.552152	0.145314	0.242108		20	0.240944	0.236734	0.291563	0.230758		20	-0.180518	0.315418	-0.14625	0.0113499
21	0.211618	0.243303	0.352864	0.192215								21	-0.0602921	-0.245332	0.245964	0.0596604
22	0.207215	0.258804	0.26922	0.264761								22	-0.116653	0.0986235	0.0887671	-0.0707375
23	0.201822	0.295622	0.326917	0.175639								23	-0.0738128	0.136379	0.0663275	-0.128894
24	0.219322	0.225061	0.322634	0.232983								24	-0.0432345	0.0676596	-0.0102778	-0.0141473
25	0.254957	0.233454	0.264524	0.247065								25	0.0471165	0.0662632	-0.172806	0.0594264
26	0.276051	0.225535	0.263328	0.235087								26	0.0858881	0.00730706	-0.136722	0.0435267
27	0.268934	0.215536	0.302875	0.212654								27	0.0748249	-0.0460031	-0.0228299	-0.00599196
28	0.260643	0.218368	0.302707	0.218283								28	0.0541123	-0.0254018	-0.0159883	-0.0127222
29	0.258567	0.227871	0.289082	0.224481								29	0.0394731	-0.0225155	-0.0285296	0.0115721
30	0.25869	0.232011	0.287376	0.221923								30	0.0285309	-0.0285996	-0.0135914	0.0136601
31	0.254777	0.225862	0.29639	0.222971								31	0.0140129	-0.0296801	0.00240771	0.0132594
32	0.237876	0.222239	0.319722	0.220162								32	-0.0110035	-0.0294733	0.0354828	0.00499401
33	0.247872	0.22973	0.301921	0.220477								33	-0.00808889	-0.00822657	0.0205277	-0.00421219
34	0.242946	0.234468	0.294291	0.228295								34	-0.0200208	0.00994188	0.0101229	-4.4028e-05
35	0.235234	0.24269	0.28385	0.238226								35	-0.0350024	0.0311497	-0.00823186	0.0120846
36	0.267492	0.206748	0.282587	0.243173								36	7.28998e-05	0.0110654	-0.0191338	0.00799555
37	0.261127	0.205008	0.314565	0.2193								37	-0.00876126	0.0114011	0.00388817	-0.00652797
38	0.282847	0.177006	0.343401	0.196747								38	-0.0180283	0.0117361	0.00188001	0.00441217
39	0.188673	0.288623	0.309718	0.212986								39	-0.0142832	0.0233757	-0.004566	-0.00452647
40	0.213856	0.254909	0.248039	0.283196								40	-0.0270881	0.0181746	-0.0435245	0.052438

## Sheet: panel E
Secondary structure frequencies predicted by RNAfold (bash script ssfreq.sh), scroll down to find the averaged values + stdev
experimental dataset (720069 sequences)										synthetic dataset (300000 sequences), syn300k_1.fa								difference
pos	dot	ob	cb	%dot	%ob	%cb		structured		pos	dot	ob	cb	%dot	%ob	%cb		D%dot	D%ob	D%cb
1	588603	131466	0	0.817426	0.182574	0		0.182574		1	247712	52288	0	0.825707	0.174293	0		-0.00828084	0.00828084	0
2	507483	212586	0	0.70477	0.29523	0		0.29523		2	212397	87603	0	0.70799	0.29201	0		-0.00322004	0.00322004	0
3	443384	276685	0	0.615752	0.384248	0		0.384248		3	185570	114430	0	0.618567	0.381433	0		-0.00281457	0.00281457	0
4	399954	320115	0	0.555438	0.444562	0		0.444562		4	167074	132926	0	0.556913	0.443087	0		-0.0014749	0.0014749	0
5	371786	348283	0	0.51632	0.48368	0		0.48368		5	154776	145224	0	0.51592	0.48408	0		0.000399964	-0.000399964	0
6	358767	361302	0	0.49824	0.50176	0		0.50176		6	149348	150652	0	0.497827	0.502173	0		0.000413085	-0.000413085	0
7	358036	360603	1430	0.497225	0.50079	0.00198592		0.502775		7	148442	151060	498	0.494807	0.503533	0.00166		0.0024179	-0.00274383	0.000325921
8	361158	353206	5705	0.50156	0.490517	0.00792285		0.49844		8	148973	148899	2128	0.496577	0.49633	0.00709333		0.0049836	-0.00581312	0.000829519
9	363764	343017	13288	0.505179	0.476367	0.0184538		0.494821		9	149503	145537	4960	0.498343	0.485123	0.0165333		0.00683603	-0.00875649	0.00192045
10	364936	330541	24592	0.506807	0.459041	0.0341523		0.493193		10	150851	140135	9014	0.502837	0.467117	0.0300467		0.00397032	-0.00807594	0.00410562
11	365445	316822	37802	0.507514	0.439988	0.0524977		0.492486		11	152779	133600	13621	0.509263	0.445333	0.0454033		-0.00174947	-0.00534494	0.00709441
12	366964	301808	51297	0.509623	0.419138	0.071239		0.490377		12	154227	127108	18665	0.51409	0.423693	0.0622167		-0.00446662	-0.00455572	0.00902234
13	370543	285571	63955	0.514594	0.396588	0.0888179		0.485406		13	155560	120868	23572	0.518533	0.402893	0.0785733		-0.00393959	-0.00630495	0.0102445
14	373933	268323	77813	0.519302	0.372635	0.108063		0.480698		14	155837	114995	29168	0.519457	0.383317	0.0972267		-0.000155044	-0.0106815	0.0108366
15	378160	250716	91193	0.525172	0.348183	0.126645		0.474828		15	156137	108799	35064	0.520457	0.362663	0.11688		0.00471523	-0.01448	0.00976481
16	380288	234115	105666	0.528127	0.325129	0.146744		0.471873		16	156486	102342	41172	0.52162	0.34114	0.13724		0.00650717	-0.0160114	0.00950427
17	378016	220656	121397	0.524972	0.306437	0.168591		0.475028		17	156623	95737	47640	0.522077	0.319123	0.1588		0.00289525	-0.012686	0.00979079
18	366002	211699	142368	0.508287	0.293998	0.197714		0.491713		18	155573	89468	54959	0.518577	0.298227	0.183197		-0.0102893	-0.00422845	0.0145177
19	343745	208785	167539	0.477378	0.289951	0.232671		0.522622		19	150682	84863	64455	0.502273	0.282877	0.21485		-0.0248955	0.00707471	0.0178208
20	328749	201046	190274	0.456552	0.279204	0.264244		0.543448		20	146984	79750	73266	0.489947	0.265833	0.24422		-0.0333946	0.0133705	0.0200241
21	344834	172568	202667	0.47889	0.239655	0.281455		0.52111		21	157039	66615	76346	0.523463	0.22205	0.254487		-0.0445731	0.0176048	0.0269683
22	346805	155731	217533	0.481627	0.216272	0.3021		0.518373		22	157223	59217	83560	0.524077	0.19739	0.278533		-0.0424492	0.0188823	0.0235669
23	349618	138791	231660	0.485534	0.192747	0.321719		0.514466		23	155101	53074	91825	0.517003	0.176913	0.306083		-0.0314693	0.0158335	0.0156358
24	359219	120107	240743	0.498867	0.166799	0.334333		0.501133		24	154878	46457	98665	0.51626	0.154857	0.328883		-0.0173925	0.0119426	0.0054499
25	369836	102669	247564	0.513612	0.142582	0.343806		0.486388		25	155643	39925	104432	0.51881	0.133083	0.348107		-0.00519811	0.00949884	-0.00430073
26	376389	86974	256706	0.522712	0.120786	0.356502		0.477288		26	156065	33889	110046	0.520217	0.112963	0.36682		0.00249574	0.00782231	-0.0103181
27	374293	73859	271917	0.519802	0.102572	0.377626		0.480198		27	154804	28731	116465	0.516013	0.09577	0.388217		0.00378824	0.00680211	-0.0105904
28	370082	61185	288802	0.513954	0.084971	0.401075		0.486046		28	153275	23818	122907	0.510917	0.0793933	0.40969		0.00303686	0.00557769	-0.00861455
29	366928	48948	304193	0.509573	0.0679768	0.42245		0.490427		29	152644	18927	128429	0.508813	0.06309	0.428097		0.000760055	0.00488682	-0.00564687
30	368212	36459	315398	0.511357	0.0506326	0.438011		0.488643		30	152840	14148	133012	0.509467	0.04716	0.443373		0.00188988	0.00347265	-0.00536253
31	368707	25073	326289	0.512044	0.0348203	0.453136		0.487956		31	152784	9727	137489	0.50928	0.0324233	0.458297		0.00276398	0.00239694	-0.00516093
32	370576	14562	334931	0.51464	0.0202231	0.465137		0.48536		32	152591	5494	141915	0.508637	0.0183133	0.47305		0.0060029	0.00190973	-0.00791263
33	375904	6147	338018	0.522039	0.00853668	0.469424		0.477961		33	153442	2183	144375	0.511473	0.00727667	0.48125		0.0105655	0.00126002	-0.0118255
34	381593	882	337594	0.529939	0.00122488	0.468836		0.470061		34	154448	268	145284	0.514827	0.000893333	0.48428		0.0151128	0.000331549	-0.0154444
35	387314	0	332755	0.537885	0	0.462115		0.462115		35	156395	0	143605	0.521317	0	0.478683		0.0165679	0	-0.0165679
36	397768	0	322301	0.552403	0	0.447597		0.447597		36	160465	0	139535	0.534883	0	0.465117		0.0175193	0	-0.0175193
37	410837	0	309232	0.570552	0	0.429448		0.429448		37	166253	0	133747	0.554177	0	0.445823		0.0163756	0	-0.0163756
38	438254	0	281815	0.608628	0	0.391372		0.391372		38	179988	0	120012	0.59996	0	0.40004		0.00866778	0	-0.00866778
39	503014	0	217055	0.698564	0	0.301436		0.301436		39	206897	0	93103	0.689657	0	0.310343		0.00890694	0	-0.00890694
40	610261	0	109808	0.847504	0	0.152496		0.152496		40	254177	0	45823	0.847257	0	0.152743		0.000246836	0	-0.000246836
experimental dataset (720069 sequences)										synthetic dataset (300000 sequences), syn300k_2.fa								difference
pos	dot	ob	cb	%dot	%ob	%cb		structured		pos	dot	ob	cb	%dot	%ob	%cb		D%dot	D%ob	D%cb
1	588603	131466	0	0.817426	0.182574	0		0.182574		1	247866	52134	0	0.82622	0.17378	0		-0.00879417	0.00879417	0
2	507483	212586	0	0.70477	0.29523	0		0.29523		2	212140	87860	0	0.707133	0.292867	0		-0.00236337	0.00236337	0
3	443384	276685	0	0.615752	0.384248	0		0.384248		3	185724	114276	0	0.61908	0.38092	0		-0.0033279	0.0033279	0
4	399954	320115	0	0.555438	0.444562	0		0.444562		4	167365	132635	0	0.557883	0.442117	0		-0.0024449	0.0024449	0
5	371786	348283	0	0.51632	0.48368	0		0.48368		5	154885	145115	0	0.516283	0.483717	0		3.66304e-05	-3.66304e-05	0
6	358767	361302	0	0.49824	0.50176	0		0.50176		6	149214	150786	0	0.49738	0.50262	0		0.000859752	-0.000859752	0
7	358036	360603	1430	0.497225	0.50079	0.00198592		0.502775		7	148803	150714	483	0.49601	0.50238	0.00161		0.00121457	-0.00159049	0.000375921
8	361158	353206	5705	0.50156	0.490517	0.00792285		0.49844		8	149452	148458	2090	0.498173	0.49486	0.00696667		0.00338693	-0.00434312	0.000956185
9	363764	343017	13288	0.505179	0.476367	0.0184538		0.494821		9	150212	144899	4889	0.500707	0.482997	0.0162967		0.0044727	-0.00662982	0.00215712
10	364936	330541	24592	0.506807	0.459041	0.0341523		0.493193		10	150952	140172	8876	0.503173	0.46724	0.0295867		0.00363365	-0.00819927	0.00456562
11	365445	316822	37802	0.507514	0.439988	0.0524977		0.492486		11	152190	134246	13564	0.5073	0.447487	0.0452133		0.000213863	-0.00749828	0.00728441
12	366964	301808	51297	0.509623	0.419138	0.071239		0.490377		12	154058	127231	18711	0.513527	0.424103	0.06237		-0.00390328	-0.00496572	0.00886901
13	370543	285571	63955	0.514594	0.396588	0.0888179		0.485406		13	155481	120869	23650	0.51827	0.402897	0.0788333		-0.00367626	-0.00630828	0.00998454
14	373933	268323	77813	0.519302	0.372635	0.108063		0.480698		14	155921	115010	29069	0.519737	0.383367	0.0968967		-0.000435044	-0.0107315	0.0111666
15	378160	250716	91193	0.525172	0.348183	0.126645		0.474828		15	156519	108575	34906	0.52173	0.361917	0.116353		0.00344189	-0.0137334	0.0102915
16	380288	234115	105666	0.528127	0.325129	0.146744		0.471873		16	157118	101801	41081	0.523727	0.339337	0.136937		0.0044005	-0.0142081	0.0098076
17	378016	220656	121397	0.524972	0.306437	0.168591		0.475028		17	157163	95313	47524	0.523877	0.31771	0.158413		0.00109525	-0.0112727	0.0101775
18	366002	211699	142368	0.508287	0.293998	0.197714		0.491713		18	155281	89433	55286	0.517603	0.29811	0.184287		-0.00931593	-0.00411179	0.0134277
19	343745	208785	167539	0.477378	0.289951	0.232671		0.522622		19	150591	84778	64631	0.50197	0.282593	0.215437		-0.0245921	0.00735805	0.0172341
20	328749	201046	190274	0.456552	0.279204	0.264244		0.543448		20	147448	79264	73288	0.491493	0.264213	0.244293		-0.0349413	0.0149905	0.0199508
21	344834	172568	202667	0.47889	0.239655	0.281455		0.52111		21	156967	66475	76558	0.523223	0.221583	0.255193		-0.0443331	0.0180715	0.0262616
22	346805	155731	217533	0.481627	0.216272	0.3021		0.518373		22	156796	59217	83987	0.522653	0.19739	0.279957		-0.0410259	0.0188823	0.0221435
23	349618	138791	231660	0.485534	0.192747	0.321719		0.514466		23	154826	53022	92152	0.516087	0.17674	0.307173		-0.0305526	0.0160068	0.0145458
24	359219	120107	240743	0.498867	0.166799	0.334333		0.501133		24	154666	46379	98955	0.515553	0.154597	0.32985		-0.0166859	0.0122026	0.00448324
25	369836	102669	247564	0.513612	0.142582	0.343806		0.486388		25	155623	39860	104517	0.518743	0.132867	0.34839		-0.00513144	0.0097155	-0.00458406
26	376389	86974	256706	0.522712	0.120786	0.356502		0.477288		26	155973	34034	109993	0.51991	0.113447	0.366643		0.00280241	0.00733898	-0.0101414
27	374293	73859	271917	0.519802	0.102572	0.377626		0.480198		27	154784	28831	116385	0.515947	0.0961033	0.38795		0.00385491	0.00646878	-0.0103237
28	370082	61185	288802	0.513954	0.084971	0.401075		0.486046		28	153232	23893	122875	0.510773	0.0796433	0.409583		0.00318019	0.00532769	-0.00850788
29	366928	48948	304193	0.509573	0.0679768	0.42245		0.490427		29	152867	19042	128091	0.509557	0.0634733	0.42697		1.67214e-05	0.00450349	-0.00452021
30	368212	36459	315398	0.511357	0.0506326	0.438011		0.488643		30	153002	14254	132744	0.510007	0.0475133	0.44248		0.00134988	0.00311931	-0.0044692
31	368707	25073	326289	0.512044	0.0348203	0.453136		0.487956		31	153113	9943	136944	0.510377	0.0331433	0.45648		0.00166732	0.00167694	-0.00334426
32	370576	14562	334931	0.51464	0.0202231	0.465137		0.48536		32	152994	5593	141413	0.50998	0.0186433	0.471377		0.00465957	0.00157973	-0.0062393
33	375904	6147	338018	0.522039	0.00853668	0.469424		0.477961		33	153846	2240	143914	0.51282	0.00746667	0.479713		0.00921886	0.00107002	-0.0102889
34	381593	882	337594	0.529939	0.00122488	0.468836		0.470061		34	154990	279	144731	0.516633	0.00093	0.482437		0.0133062	0.000294883	-0.013601
35	387314	0	332755	0.537885	0	0.462115		0.462115		35	156878	0	143122	0.522927	0	0.477073		0.0149579	0	-0.0149579
36	397768	0	322301	0.552403	0	0.447597		0.447597		36	160879	0	139121	0.536263	0	0.463737		0.0161393	0	-0.0161393
37	410837	0	309232	0.570552	0	0.429448		0.429448		37	166257	0	133743	0.55419	0	0.44581		0.0163623	0	-0.0163623
38	438254	0	281815	0.608628	0	0.391372		0.391372		38	179657	0	120343	0.598857	0	0.401143		0.00977112	0	-0.00977112
39	503014	0	217055	0.698564	0	0.301436		0.301436		39	206721	0	93279	0.68907	0	0.31093		0.00949361	0	-0.00949361
40	610261	0	109808	0.847504	0	0.152496		0.152496		40	254284	0	45716	0.847613	0	0.152387		-0.00010983	0	0.00010983
experimental dataset (720069 sequences)										synthetic dataset (300000 sequences), syn300k_3.fa								difference
pos	dot	ob	cb	%dot	%ob	%cb		structured		pos	dot	ob	cb	%dot	%ob	%cb		D%dot	D%ob	D%cb
1	588603	131466	0	0.817426	0.182574	0		0.182574		1	248161	51839	0	0.827203	0.172797	0		-0.0097775	0.0097775	0
2	507483	212586	0	0.70477	0.29523	0		0.29523		2	212245	87755	0	0.707483	0.292517	0		-0.00271337	0.00271337	0
3	443384	276685	0	0.615752	0.384248	0		0.384248		3	185666	114334	0	0.618887	0.381113	0		-0.00313457	0.00313457	0
4	399954	320115	0	0.555438	0.444562	0		0.444562		4	166921	133079	0	0.556403	0.443597	0		-0.000964896	0.000964896	0
5	371786	348283	0	0.51632	0.48368	0		0.48368		5	154628	145372	0	0.515427	0.484573	0		0.000893297	-0.000893297	0
6	358767	361302	0	0.49824	0.50176	0		0.50176		6	149249	150751	0	0.497497	0.502503	0		0.000743085	-0.000743085	0
7	358036	360603	1430	0.497225	0.50079	0.00198592		0.502775		7	148560	150952	488	0.4952	0.503173	0.00162667		0.00202457	-0.00238383	0.000359254
8	361158	353206	5705	0.50156	0.490517	0.00792285		0.49844		8	149271	148685	2044	0.49757	0.495617	0.00681333		0.00399027	-0.00509979	0.00110952
9	363764	343017	13288	0.505179	0.476367	0.0184538		0.494821		9	150002	145176	4822	0.500007	0.48392	0.0160733		0.0051727	-0.00755315	0.00238045
10	364936	330541	24592	0.506807	0.459041	0.0341523		0.493193		10	151665	139508	8827	0.50555	0.465027	0.0294233		0.00125699	-0.00598594	0.00472895
11	365445	316822	37802	0.507514	0.439988	0.0524977		0.492486		11	152499	133887	13614	0.50833	0.44629	0.04538		-0.000816137	-0.00630161	0.00711775
12	366964	301808	51297	0.509623	0.419138	0.071239		0.490377		12	154094	127141	18765	0.513647	0.423803	0.06255		-0.00402328	-0.00466572	0.00868901
13	370543	285571	63955	0.514594	0.396588	0.0888179		0.485406		13	155274	121052	23674	0.51758	0.403507	0.0789133		-0.00298626	-0.00691828	0.00990454
14	373933	268323	77813	0.519302	0.372635	0.108063		0.480698		14	156163	114691	29146	0.520543	0.382303	0.0971533		-0.00124171	-0.00966821	0.0109099
15	378160	250716	91193	0.525172	0.348183	0.126645		0.474828		15	156226	108849	34925	0.520753	0.36283	0.116417		0.00441856	-0.0146467	0.0102281
16	380288	234115	105666	0.528127	0.325129	0.146744		0.471873		16	156526	102203	41271	0.521753	0.340677	0.13757		0.00637383	-0.0155481	0.00917427
17	378016	220656	121397	0.524972	0.306437	0.168591		0.475028		17	156397	96002	47601	0.521323	0.320007	0.15867		0.00364858	-0.0135694	0.00992079
18	366002	211699	142368	0.508287	0.293998	0.197714		0.491713		18	155255	89474	55271	0.517517	0.298247	0.184237		-0.00922927	-0.00424845	0.0134777
19	343745	208785	167539	0.477378	0.289951	0.232671		0.522622		19	150330	85217	64453	0.5011	0.284057	0.214843		-0.0237221	0.00589471	0.0178274
20	328749	201046	190274	0.456552	0.279204	0.264244		0.543448		20	147255	79538	73207	0.49085	0.265127	0.244023		-0.0342979	0.0140771	0.0202208
21	344834	172568	202667	0.47889	0.239655	0.281455		0.52111		21	157577	66264	76159	0.525257	0.22088	0.253863		-0.0463664	0.0187748	0.0275916
22	346805	155731	217533	0.481627	0.216272	0.3021		0.518373		22	157500	59017	83483	0.525	0.196723	0.278277		-0.0433725	0.019549	0.0238235
23	349618	138791	231660	0.485534	0.192747	0.321719		0.514466		23	155166	52713	92121	0.51722	0.17571	0.30707		-0.031686	0.0170368	0.0146492
24	359219	120107	240743	0.498867	0.166799	0.334333		0.501133		24	154708	46364	98928	0.515693	0.154547	0.32976		-0.0168259	0.0122526	0.00457324
25	369836	102669	247564	0.513612	0.142582	0.343806		0.486388		25	155607	39892	104501	0.51869	0.132973	0.348337		-0.00507811	0.00960884	-0.00453073
26	376389	86974	256706	0.522712	0.120786	0.356502		0.477288		26	156129	34134	109737	0.52043	0.11378	0.36579		0.00228241	0.00700565	-0.00928805
27	374293	73859	271917	0.519802	0.102572	0.377626		0.480198		27	154719	28840	116441	0.51573	0.0961333	0.388137		0.00407157	0.00643878	-0.0105104
28	370082	61185	288802	0.513954	0.084971	0.401075		0.486046		28	153222	24121	122657	0.51074	0.0804033	0.408857		0.00321352	0.00456769	-0.00778121
29	366928	48948	304193	0.509573	0.0679768	0.42245		0.490427		29	152756	19248	127996	0.509187	0.06416	0.426653		0.000386721	0.00381682	-0.00420354
30	368212	36459	315398	0.511357	0.0506326	0.438011		0.488643		30	152818	14203	132979	0.509393	0.0473433	0.443263		0.00196322	0.00328931	-0.00525253
31	368707	25073	326289	0.512044	0.0348203	0.453136		0.487956		31	153153	9832	137015	0.51051	0.0327733	0.456717		0.00153398	0.00204694	-0.00358093
32	370576	14562	334931	0.51464	0.0202231	0.465137		0.48536		32	152865	5576	141559	0.50955	0.0185867	0.471863		0.00508957	0.0016364	-0.00672596
33	375904	6147	338018	0.522039	0.00853668	0.469424		0.477961		33	153717	2228	144055	0.51239	0.00742667	0.480183		0.00964886	0.00111002	-0.0107589
34	381593	882	337594	0.529939	0.00122488	0.468836		0.470061		34	155080	275	144645	0.516933	0.000916667	0.48215		0.0130062	0.000308216	-0.0133144
35	387314	0	332755	0.537885	0	0.462115		0.462115		35	156318	0	143682	0.52106	0	0.47894		0.0168246	0	-0.0168246
36	397768	0	322301	0.552403	0	0.447597		0.447597		36	160449	0	139551	0.53483	0	0.46517		0.0175726	0	-0.0175726
37	410837	0	309232	0.570552	0	0.429448		0.429448		37	166005	0	133995	0.55335	0	0.44665		0.0172023	0	-0.0172023
38	438254	0	281815	0.608628	0	0.391372		0.391372		38	179370	0	120630	0.5979	0	0.4021		0.0107278	0	-0.0107278
39	503014	0	217055	0.698564	0	0.301436		0.301436		39	206179	0	93821	0.687263	0	0.312737		0.0113003	0	-0.0113003
40	610261	0	109808	0.847504	0	0.152496		0.152496		40	253851	0	46149	0.84617	0	0.15383		0.0013335	0	-0.0013335
average
	mean difference
pos	D%dot	stdev	D%ob	stdev	D%cb	stdev
1	-0.00895084	0.000760533	0.00895084	0.000760533	0	0
2	-0.0027656	0.000430714	0.0027656	0.000430714	0	0
3	-0.00309234	0.000259258	0.00309234	0.000259258	0	0
4	-0.00162823	0.00075182	0.00162823	0.00075182	0	0
5	0.000443297	0.000429974	-0.000443297	0.000429974	0	0
6	0.000671974	0.000231669	-0.000671974	0.000231669	0	0
7	0.00188568	0.000613572	-0.00223938	0.000590078	0.000353699	2.54588e-05
8	0.00412027	0.000806233	-0.00508534	0.000735106	0.000965074	0.000140211
9	0.00549381	0.00121395	-0.00764649	0.0010664	0.00215268	0.000230032
10	0.00295365	0.00147897	-0.00742038	0.00124379	0.00446673	0.000323219
11	-0.000783915	0.000982063	-0.00638161	0.00107889	0.00716552	0.00010362
12	-0.00413106	0.000296729	-0.00472906	0.000212211	0.00886012	0.000166844
13	-0.00353404	0.000492323	-0.00651051	0.00035315	0.0100445	0.000177764
14	-0.0006106	0.000564204	-0.0103604	0.000600003	0.010971	0.00017328
15	0.00419189	0.000666242	-0.0142867	0.000486393	0.0100948	0.000287537
16	0.0057605	0.00117968	-0.0152559	0.000936508	0.00949538	0.00031676
17	0.00254636	0.00131193	-0.0125094	0.00115848	0.00996301	0.000196761
18	-0.00961149	0.00058857	-0.00419623	7.38116e-05	0.0138077	0.000615386
19	-0.0244032	0.000609046	0.00677582	0.000776104	0.0176274	0.000340653
20	-0.0342113	0.000776967	0.014146	0.000812194	0.0200652	0.000139616
21	-0.0450909	0.00111116	0.0181504	0.000588976	0.0269405	0.000665435
22	-0.0422825	0.00118218	0.0191046	0.0003849	0.023178	0.000905001
23	-0.031236	0.000601618	0.0162924	0.000650507	0.0149436	0.000601704
24	-0.0169681	0.000374186	0.0121326	0.000166433	0.00483546	0.000534024
25	-0.00513589	6.01233e-05	0.00960772	0.000108338	-0.00447184	0.000150567
26	0.00252685	0.000261392	0.00738898	0.000410623	-0.00991583	0.000550801
27	0.00390491	0.000148137	0.00656989	0.000201669	-0.0104748	0.000136843
28	0.00314352	9.38675e-05	0.00515769	0.000526023	-0.00830121	0.00045348
29	0.000387833	0.000371668	0.00440237	0.000542119	-0.00479021	0.000758603
30	0.00173433	0.000334952	0.00329376	0.000176709	-0.00502809	0.000487127
31	0.00198843	0.000674951	0.00204027	0.000360046	-0.0040287	0.000987648
32	0.00525068	0.000686006	0.00170862	0.000176457	-0.0069593	0.000860723
33	0.00981108	0.000687833	0.00114668	0.000100167	-0.0109578	0.000787403
34	0.0138084	0.0011396	0.000311549	1.85592e-05	-0.0141199	0.00115592
35	0.0161168	0.0010118	0	0	-0.0161168	0.0010118
36	0.0170771	0.000812577	0	0	-0.0170771	0.000812577
37	0.0166467	0.000481171	0	0	-0.0166467	0.000481171
38	0.00972223	0.00103087	0	0	-0.00972223	0.00103087
39	0.00990028	0.00124742	0	0	-0.00990028	0.00124742
40	0.00049017	0.000751805	0	0	-0.00049017	0.000751805
