# Supplementary material for: Random-sequence genetic oligomer pools display an innate potential for ligation and recombination
Source: eLife. 2018 Nov 21;7:e43022. doi: 10.7554/eLife.43022 (PMC6289569; doi:10.7554/eLife.43022)
Supplement: Figure 2—figure supplement 1—source data 1. [file elife-43022-fig2-figsupp1-data1.xlsx]

## Sheet: panel B, C1>p C2 noMg, nt freq
This file contains all nucleotide frequencies for randomer and semi-randomer RNAs used for >p ligation experiments as well as the nucleotide frequency for the C1-bait >p x prey-C2 ligation product
position	A	C	G	U
1	0	0	1	0	C1	dataset has been filtered using perfect matches for C1 / C2
2	0	0	1	0									0	0	1	0	0
3	0	1	0	0									0	0	1	0	0
4	0	0	1	0									0	1	0	0	0
5	0	1	0	0									0	0	1	0	0
6	0	0	1	0									0	1	0	0	0
7	1	0	0	0									0	0	1	0	0
8	1	0	0	0									1	0	0	0	0
9	1	0	0	0									1	0	0	0	0
10	0	0	0	1									1	0	0	0	0
11	0	0	0	1									0	0	0	1	0
12	1	0	0	0									0	0	0	1	0
13	1	0	0	0									1	0	0	0	0
14	0	0	0	1									1	0	0	0	0
15	1	0	0	0									0	0	0	1	0
16	0	1	0	0									1	0	0	0	0
17	0	0	1	0									0	1	0	0	0
18	1	0	0	0									0	0	1	0	0
19	0	1	0	0									1	0	0	0	0
20	0	0	0	1									0	1	0	0	0
21	0.201353	0.143772	0.383848	0.271027	N40								0	0	0	1	0
22	0.203062	0.150347	0.38088	0.26571									0.201353	0.143772	0.383848	0.271027	0
23	0.212872	0.16059	0.352615	0.273924									0.203062	0.150347	0.38088	0.26571	0
24	0.203115	0.151982	0.36551	0.279393									0.212872	0.16059	0.352615	0.273924	0
25	0.204012	0.146849	0.366854	0.282285									0.203115	0.151982	0.36551	0.279393	0
26	0.203077	0.148759	0.360133	0.288031									0.204012	0.146849	0.366854	0.282285	0
27	0.202445	0.148814	0.359866	0.288875									0.203077	0.148759	0.360133	0.288031	0
28	0.208454	0.158675	0.35011	0.28276									0.202445	0.148814	0.359866	0.288875	0
29	0.206478	0.159135	0.348577	0.285809									0.208454	0.158675	0.35011	0.28276	0
30	0.203013	0.151439	0.353776	0.291772									0.206478	0.159135	0.348577	0.285809	0
31	0.208521	0.161652	0.348247	0.28158									0.203013	0.151439	0.353776	0.291772	0
32	0.201905	0.154553	0.35793	0.285612									0.208521	0.161652	0.348247	0.28158	0
33	0.207023	0.157557	0.349326	0.286094									0.201905	0.154553	0.35793	0.285612	0
34	0.209837	0.157243	0.342231	0.290688									0.207023	0.157557	0.349326	0.286094	0
35	0.217536	0.169497	0.317717	0.29525									0.209837	0.157243	0.342231	0.290688	0
36	0.216599	0.151773	0.325988	0.305639									0.217536	0.169497	0.317717	0.29525	0
37	0.217306	0.150276	0.331698	0.30072									0.216599	0.151773	0.325988	0.305639	0
38	0.197078	0.158337	0.367792	0.276794									0.217306	0.150276	0.331698	0.30072	0
39	0.106186	0.174012	0.412726	0.307075									0.197078	0.158337	0.367792	0.276794	0
40	0.0668756	0.521081	0.208281	0.203762									0.106186	0.174012	0.412726	0.307075	0
41	0.161471	0.263905	0.423368	0.151256									0.0668756	0.521081	0.208281	0.203762	0
42	0.158496	0.305032	0.203651	0.332821									0.161471	0.263905	0.423368	0.151256	0
43	0.138901	0.34645	0.331604	0.183045									0.158496	0.305032	0.203651	0.332821	0
44	0.143215	0.211219	0.34848	0.297085									0.138901	0.34645	0.331604	0.183045	0
45	0.174275	0.224316	0.257448	0.343961									0.143215	0.211219	0.34848	0.297085	0
46	0.179969	0.218916	0.261789	0.339326									0.174275	0.224316	0.257448	0.343961	0
47	0.187354	0.199156	0.321357	0.292134									0.179969	0.218916	0.261789	0.339326	0
48	0.176359	0.203263	0.32089	0.299488									0.187354	0.199156	0.321357	0.292134	0
49	0.171279	0.217546	0.293214	0.317961									0.176359	0.203263	0.32089	0.299488	0
50	0.174297	0.22648	0.290126	0.309096									0.171279	0.217546	0.293214	0.317961	0
51	0.174113	0.215156	0.308018	0.302714									0.174297	0.22648	0.290126	0.309096	0
52	0.157777	0.205133	0.34506	0.29203									0.174113	0.215156	0.308018	0.302714	0
53	0.170546	0.21049	0.322551	0.296413									0.157777	0.205133	0.34506	0.29203	0
54	0.161041	0.226247	0.30028	0.312432									0.170546	0.21049	0.322551	0.296413	0
55	0.152847	0.232087	0.288065	0.327001									0.161041	0.226247	0.30028	0.312432	0
56	0.180381	0.20741	0.286457	0.325752									0.152847	0.232087	0.288065	0.327001	0
57	0.186237	0.203785	0.298542	0.311437									0.180381	0.20741	0.286457	0.325752	0
58	0.17327	0.207304	0.290423	0.329003									0.186237	0.203785	0.298542	0.311437	0
59	0.167227	0.215749	0.302362	0.314663									0.17327	0.207304	0.290423	0.329003	0
60	0.197694	0.216761	0.348259	0.237287									0.167227	0.215749	0.302362	0.314663	0
61	0	1	0	0	C2								0.197694	0.216761	0.348259	0.237287	0
62	1	0	0	0									0	1	0	0	0
63	0	1	0	0									1	0	0	0	0
64	0	0	1	0									0	1	0	0	0
65	0	1	0	0									0	0	1	0	0
66	0	0	0	1									0	1	0	0	0
67	0	0	1	0									0	0	0	1	0
68	0	1	0	0									0	0	1	0	0
69	0	1	0	0									0	1	0	0	0
70	0	1	0	0									0	1	0	0	0
71	0	0	1	0									0	1	0	0	0
72	0	0	0	1									0	0	1	0	0
73	1	0	0	0									0	0	0	1	0
74	0	0	0	1									1	0	0	0	0
75	0	0	1	0									0	0	0	1	0
76	0	0	0	1									0	0	1	0	0
77	1	0	0	0									0	0	0	1	0
78	0	0	0	1									1	0	0	0	0
79	1	0	0	0									0	0	0	1	0
80	0	0	0	1									1	0	0	0	0
													0	0	0	1	0

## Sheet: panel B, C1>p C2 noMg, ss freq
Secondary structure frequencies predicted by RNAfold (bash script ssfreq.sh), scroll down to find the averaged values + stdev
experimental dataset (1,197,879 sequences)										synthetic dataset (1,000,000 sequences)								difference
pos	dot	ob	cb	%dot	%ob	%cb		structured		pos	dot	ob	cb	%dot	%ob	%cb		D%dot	D%ob	D%cb
1	423193	774686	0	0.353285	0.646715	0		0.646715		1	365553	634447	0	0.365553	0.634447	0		-0.0122677	0.0122677	0
2	357149	840730	0	0.298151	0.701849	0		0.701849		2	313612	686388	0	0.313612	0.686388	0		-0.0154609	0.0154609	0
3	362821	835058	0	0.302886	0.697114	0		0.697114		3	318068	681932	0	0.318068	0.681932	0		-0.0151818	0.0151818	0
4	347905	849974	0	0.290434	0.709566	0		0.709566		4	309469	690531	0	0.309469	0.690531	0		-0.0190348	0.0190348	0
5	353404	844475	0	0.295025	0.704975	0		0.704975		5	310453	689547	0	0.310453	0.689547	0		-0.0154282	0.0154282	0
6	418318	779561	0	0.349216	0.650784	0		0.650784		6	354634	645366	0	0.354634	0.645366	0		-0.00541843	0.00541843	0
7	939258	258621	0	0.784101	0.215899	0		0.215899		7	792960	207040	0	0.79296	0.20704	0		-0.0088591	0.0088591	0
8	1001915	195964	0	0.836408	0.163592	0		0.163592		8	846059	153941	0	0.846059	0.153941	0		-0.00965148	0.00965148	0
9	874588	323291	0	0.730114	0.269886	0		0.269886		9	750159	249841	0	0.750159	0.249841	0		-0.0200452	0.0200452	0
10	816670	381209	0	0.681763	0.318237	0		0.318237		10	703429	296571	0	0.703429	0.296571	0		-0.0216656	0.0216656	0
11	898021	299858	0	0.749676	0.250324	0		0.250324		11	765898	234102	0	0.765898	0.234102	0		-0.0162221	0.0162221	0
12	923945	273934	0	0.771317	0.228683	0		0.228683		12	785632	214368	0	0.785632	0.214368	0		-0.0143145	0.0143145	0
13	684897	512982	0	0.571758	0.428242	0		0.428242		13	586531	413469	0	0.586531	0.413469	0		-0.0147729	0.0147729	0
14	628364	569515	0	0.524564	0.475436	0		0.475436		14	541398	458602	0	0.541398	0.458602	0		-0.0168342	0.0168342	0
15	591423	606456	0	0.493725	0.506275	0		0.506275		15	507728	492272	0	0.507728	0.492272	0		-0.0140028	0.0140028	0
16	464089	727399	6391	0.387426	0.607239	0.00533526		0.612574		16	393307	601654	5039	0.393307	0.601654	0.005039		-0.00588139	0.00558513	0.000296263
17	452897	726885	18097	0.378082	0.60681	0.0151075		0.621918		17	376022	610239	13739	0.376022	0.610239	0.013739		0.00206043	-0.00342896	0.00136854
18	618095	568078	11706	0.515991	0.474237	0.00977227		0.484009		18	510509	480791	8700	0.510509	0.480791	0.0087		0.00548218	-0.00655445	0.00107227
19	594559	596839	6481	0.496343	0.498246	0.0054104		0.503657		19	494658	500305	5037	0.494658	0.500305	0.005037		0.00168512	-0.00205852	0.000373396
20	615931	505210	76738	0.514185	0.421754	0.0640616		0.485815		20	523427	420446	56127	0.523427	0.420446	0.056127		-0.00924235	0.00130778	0.00793456
21	540424	546870	110585	0.451151	0.456532	0.0923173		0.548849		21	466547	451843	81610	0.466547	0.451843	0.08161		-0.0153963	0.00468892	0.0107073
22	484102	564198	149579	0.404133	0.470997	0.12487		0.595867		22	424993	461325	113682	0.424993	0.461325	0.113682		-0.0208604	0.00967249	0.0111879
23	464867	556416	176596	0.388075	0.464501	0.147424		0.611925		23	413601	448941	137458	0.413601	0.448941	0.137458		-0.0255259	0.01556	0.00996591
24	455143	540304	202432	0.379957	0.451051	0.168992		0.620043		24	405827	431690	162483	0.405827	0.43169	0.162483		-0.0258696	0.0193606	0.00650903
25	445250	527681	224948	0.371699	0.440513	0.187789		0.628301		25	396589	418136	185275	0.396589	0.418136	0.185275		-0.0248904	0.0223768	0.00251358
26	446105	515449	236325	0.372412	0.430301	0.197286		0.627588		26	395526	405416	199058	0.395526	0.405416	0.199058		-0.0231136	0.0248854	-0.0017718
27	450917	503121	243841	0.37643	0.42001	0.203561		0.62357		27	393223	397630	209147	0.393223	0.39763	0.209147		-0.0167935	0.0223799	-0.00558637
28	459218	491822	246839	0.383359	0.410577	0.206063		0.616641		28	392278	391823	215899	0.392278	0.391823	0.215899		-0.00891875	0.0187544	-0.00983562
29	469810	480592	247477	0.392202	0.401202	0.206596		0.607798		29	391501	387910	220589	0.391501	0.38791	0.220589		0.00070055	0.0132925	-0.013993
30	481612	468523	247744	0.402054	0.391127	0.206819		0.597946		30	393535	382443	224022	0.393535	0.382443	0.224022		0.00851896	0.00868415	-0.0172031
31	491986	456032	249861	0.410714	0.3807	0.208586		0.589286		31	398963	374231	226806	0.398963	0.374231	0.226806		0.0117513	0.00646855	-0.0182198
32	502841	440704	254334	0.419776	0.367904	0.21232		0.580224		32	409198	362347	228455	0.409198	0.362347	0.228455		0.0105781	0.0055566	-0.0161347
33	514599	423545	259735	0.429592	0.353579	0.216829		0.570408		33	422838	347159	230003	0.422838	0.347159	0.230003		0.0067538	0.00642012	-0.0131739
34	527839	406258	263782	0.440645	0.339148	0.220208		0.559355		34	436149	330726	233125	0.436149	0.330726	0.233125		0.00449567	0.00842178	-0.0129174
35	531573	395350	270956	0.443762	0.330042	0.226196		0.556238		35	444176	316574	239250	0.444176	0.316574	0.23925		-0.000414151	0.0134677	-0.0130535
36	517957	393599	286323	0.432395	0.32858	0.239025		0.567605		36	442939	306825	250236	0.442939	0.306825	0.250236		-0.0105439	0.0217549	-0.011211
37	473549	404255	320075	0.395323	0.337476	0.267201		0.604677		37	425708	306211	268081	0.425708	0.306211	0.268081		-0.0303851	0.0312647	-0.000879555
38	418268	419788	359823	0.349174	0.350443	0.300383		0.650826		38	396389	312872	290739	0.396389	0.312872	0.290739		-0.0472152	0.0375707	0.00964443
39	366309	428755	402815	0.305798	0.357928	0.336274		0.694202		39	351598	323467	324935	0.351598	0.323467	0.324935		-0.0458	0.0344615	0.0113385
40	354049	413046	430784	0.295563	0.344814	0.359622		0.704437		40	336793	318714	344493	0.336793	0.318714	0.344493		-0.0412298	0.0261005	0.0151293
41	363624	392656	441599	0.303557	0.327793	0.368651		0.696443		41	357622	311550	330828	0.357622	0.31155	0.330828		-0.0540655	0.0162427	0.0378228
42	393375	365876	438628	0.328393	0.305437	0.366171		0.671607		42	380583	293950	325467	0.380583	0.29395	0.325467		-0.0521901	0.0114865	0.0407035
43	417172	344992	435715	0.348259	0.288002	0.363739		0.651741		43	388373	289562	322065	0.388373	0.289562	0.322065		-0.0401141	-0.00155962	0.0416737
44	474128	321463	402288	0.395806	0.26836	0.335834		0.604194		44	413840	278232	307928	0.41384	0.278232	0.307928		-0.0180337	-0.00987184	0.0279056
45	508891	297413	391575	0.424827	0.248283	0.32689		0.575173		45	432086	259325	308589	0.432086	0.259325	0.308589		-0.00725929	-0.011042	0.0183013
46	533998	279343	384538	0.445786	0.233198	0.321016		0.554214		46	443780	246344	309876	0.44378	0.246344	0.309876		0.00200626	-0.013146	0.0111397
47	530788	273223	393868	0.443107	0.228089	0.328804		0.556893		47	438766	240700	320534	0.438766	0.2407	0.320534		0.00434052	-0.012611	0.0082705
48	520324	264193	413362	0.434371	0.220551	0.345078		0.565629		48	429572	233580	336848	0.429572	0.23358	0.336848		0.00479908	-0.0130293	0.00823026
49	515512	248143	434224	0.430354	0.207152	0.362494		0.569646		49	423048	222891	354061	0.423048	0.222891	0.354061		0.00730598	-0.015739	0.00843304
50	511634	231422	454823	0.427117	0.193193	0.37969		0.572883		50	419396	211268	369336	0.419396	0.211268	0.369336		0.0077206	-0.0180749	0.0103543
51	507457	215106	475316	0.42363	0.179572	0.396798		0.57637		51	413097	201436	385467	0.413097	0.201436	0.385467		0.0105326	-0.0218636	0.011331
52	502111	199121	496647	0.419167	0.166228	0.414605		0.580833		52	405791	192100	402109	0.405791	0.1921	0.402109		0.0133757	-0.025872	0.0124963
53	505410	179174	513295	0.421921	0.149576	0.428503		0.578079		53	409101	176416	414483	0.409101	0.176416	0.414483		0.0128197	-0.02684	0.0140202
54	508576	159720	529583	0.424564	0.133336	0.442101		0.575436		54	416118	157798	426084	0.416118	0.157798	0.426084		0.00844575	-0.0244623	0.0160166
55	511940	139289	546650	0.427372	0.11628	0.456348		0.572628		55	425575	137874	436551	0.425575	0.137874	0.436551		0.00179705	-0.0215943	0.0197973
56	510569	124111	563199	0.426228	0.103609	0.470164		0.573772		56	430172	122697	447131	0.430172	0.122697	0.447131		-0.00394448	-0.019088	0.0230325
57	505453	111930	580496	0.421957	0.0934402	0.484603		0.578043		57	429388	109617	460995	0.429388	0.109617	0.460995		-0.00743136	-0.0161768	0.0236082
58	503523	100180	594176	0.420345	0.0836312	0.496023		0.579655		58	422839	102271	474890	0.422839	0.102271	0.47489		-0.00249354	-0.0186398	0.0211334
59	512196	90130	595553	0.427586	0.0752413	0.497173		0.572414		59	429793	90074	480133	0.429793	0.090074	0.480133		-0.00220724	-0.0148327	0.0170399
60	532567	79726	585586	0.444592	0.066556	0.488852		0.555408		60	448903	75377	475720	0.448903	0.075377	0.47572		-0.00431135	-0.00882103	0.0131324
61	585999	56065	555815	0.489197	0.0468036	0.463999		0.510803		61	504370	54338	441292	0.50437	0.054338	0.441292		-0.0151728	-0.00753444	0.0227073
62	733331	64731	399817	0.612191	0.054038	0.333771		0.387809		62	628683	59290	312027	0.628683	0.05929	0.312027		-0.0164918	-0.00525199	0.0217438
63	320080	10172	867627	0.267206	0.00849168	0.724303		0.732794		63	265696	5876	728428	0.265696	0.005876	0.728428		0.00150962	0.00261568	-0.00412529
64	199080	39784	959015	0.166194	0.033212	0.800594		0.833806		64	190641	23391	785968	0.190641	0.023391	0.785968		-0.0244473	0.00982104	0.0146262
65	188083	29612	980184	0.157013	0.0247204	0.818266		0.842987		65	170509	17515	811976	0.170509	0.017515	0.811976		-0.0134956	0.00720536	0.00629029
66	712020	0	485859	0.594401	0	0.405599		0.405599		66	582841	0	417159	0.582841	0	0.417159		0.0115596	0	-0.0115596
67	198760	0	999119	0.165927	0	0.834073		0.834073		67	156581	0	843419	0.156581	0	0.843419		0.00934561	0	-0.00934561
68	206102	0	991777	0.172056	0	0.827944		0.827944		68	144648	0	855352	0.144648	0	0.855352		0.0274078	0	-0.0274078
69	249488	0	948391	0.208275	0	0.791725		0.791725		69	170026	0	829974	0.170026	0	0.829974		0.0382488	0	-0.0382488
70	741441	0	456438	0.618962	0	0.381038		0.381038		70	580917	0	419083	0.580917	0	0.419083		0.0380445	0	-0.0380445
71	744436	0	453443	0.621462	0	0.378538		0.378538		71	619394	0	380606	0.619394	0	0.380606		0.00206777	0	-0.00206777
72	765686	0	432193	0.639201	0	0.360799		0.360799		72	641581	0	358419	0.641581	0	0.358419		-0.00237954	0	0.00237954
73	918500	0	279379	0.766772	0	0.233228		0.233228		73	769483	0	230517	0.769483	0	0.230517		-0.00271106	0	0.00271106
74	795934	0	401945	0.664453	0	0.335547		0.335547		74	672602	0	327398	0.672602	0	0.327398		-0.00814925	0	0.00814925
75	898612	0	299267	0.750169	0	0.249831		0.249831		75	752270	0	247730	0.75227	0	0.24773		-0.00210074	0	0.00210074
76	902927	0	294952	0.753771	0	0.246229		0.246229		76	755764	0	244236	0.755764	0	0.244236		-0.00199254	0	0.00199254
77	868339	0	329540	0.724897	0	0.275103		0.275103		77	730888	0	269112	0.730888	0	0.269112		-0.00599091	0	0.00599091
78	902505	0	295374	0.753419	0	0.246581		0.246581		78	758628	0	241372	0.758628	0	0.241372		-0.00520883	0	0.00520883
79	1158115	0	39764	0.966805	0	0.0331953		0.0331953		79	969724	0	30276	0.969724	0	0.030276		-0.00291934	0	0.00291934
80	1178558	0	19321	0.983871	0	0.0161293		0.0161293		80	985820	0	14180	0.98582	0	0.01418		-0.00194934	0	0.00194934

## Sheet: panel C, prelig C1-bait
position	A	C	G	U
1	0.001533	0.000518273	0.997545	0.000403707	C1
2	0.0017294	0.000851059	0.996661	0.000758316
3	0.000125477	0.996394	0.000250953	0.00322966
4	0.00142389	0.000840148	0.996879	0.000856515
5	0.000305508	0.996197	0.000278231	0.00321875
6	0.00139661	0.000469174	0.99737	0.000763771
7	0.998194	0.000785593	0.000321875	0.000698305
8	0.998674	0.000480085	0.000256409	0.000589195
9	0.999171	0.000196398	0.000229131	0.000403707
10	0.000130932	0.000261864	8.18326e-05	0.999525
11	0.000163665	0.000496451	1.0911e-05	0.999329
12	0.998052	0.00118384	0.000201854	0.000561917
13	0.999029	9.27436e-05	0.000256409	0.000621928
14	0.000305508	0.000196398	3.2733e-05	0.999465
15	0.997032	0.00225312	0.000278231	0.000436441
16	0.000174576	0.996798	0.000321875	0.00270593
17	0.00142934	0.000409163	0.997605	0.000556462
18	0.999143	0.000360063	0.000332786	0.000163665
19	0.00100927	0.996481	0.000125477	0.00238406
20	0.000152754	0.000480085	8.72881e-05	0.99928
21	0.191892	0.12157	0.4005	0.286038	N20
22	0.196584	0.124113	0.409141	0.270162
23	0.191385	0.135602	0.389392	0.283621
24	0.179039	0.128968	0.415159	0.276834
25	0.179454	0.129907	0.416026	0.274614
26	0.179164	0.131701	0.408721	0.280413
27	0.179514	0.133131	0.41026	0.277096
28	0.188188	0.144358	0.395453	0.272001
29	0.192945	0.141303	0.390565	0.275187
30	0.19259	0.129726	0.391689	0.285994
31	0.203392	0.133922	0.381313	0.281373
32	0.203256	0.122193	0.380816	0.293735
33	0.205258	0.119792	0.37218	0.30277
34	0.199061	0.110834	0.377003	0.313103
35	0.21432	0.113993	0.369223	0.302464
36	0.206835	0.101822	0.337265	0.354079
37	0.214952	0.118297	0.379905	0.286845
38	0.227577	0.0882156	0.491203	0.193005
39	0.105979	0.178199	0.482698	0.233125
40	0.167528	0.265089	0.271204	0.296179

## Sheet: panel C, prelig prey-C2 
position	A	C	G	U
1	0.185701	0.154104	0.532696	0.1275	N20
2	0.0556291	0.516966	0.294475	0.132931
3	0.163067	0.205525	0.376145	0.255262
4	0.206886	0.196425	0.322614	0.274076
5	0.173304	0.207248	0.330454	0.288994
6	0.166962	0.192105	0.33174	0.309193
7	0.170882	0.210856	0.31194	0.306322
8	0.169908	0.224551	0.280655	0.324886
9	0.165102	0.240319	0.265699	0.328881
10	0.171194	0.235874	0.245425	0.347507
11	0.167299	0.228034	0.251617	0.35305
12	0.169059	0.20982	0.242628	0.378492
13	0.170595	0.206175	0.246373	0.376857
14	0.169971	0.213365	0.250268	0.366395
15	0.167811	0.222516	0.266236	0.343437
16	0.162443	0.227485	0.285711	0.324361
17	0.1565	0.241143	0.295049	0.307308
18	0.156163	0.278195	0.270543	0.295099
19	0.176051	0.238733	0.311578	0.273639
20	0.155314	0.254476	0.356745	0.233465
21	0.00187261	0.996829	0.000511847	0.000786497	C2
22	0.993109	0.00187261	0.000986243	0.00403236
23	0.000961274	0.997116	0.00149809	0.000424459
24	0.00471898	0.00191006	0.993309	6.24204e-05
25	0.00445682	0.992697	0.00107363	0.00177274
26	0.000162293	0.000836434	0.0163541	0.982647
27	0.00088637	0.00113605	0.993246	0.00473147
28	0.00451924	0.993159	0.00167287	0.000649172
29	0.00027465	0.99392	0.0050186	0.000786497
30	0.000624204	0.993346	0.00529325	0.000736561
31	0.000961274	0.00454421	0.990437	0.00405733
32	0.00485631	0.000124841	0.000524331	0.994495
33	0.994894	1.24841e-05	0.000149809	0.0049437
34	0.000636688	0.000149809	0.00131083	0.997903
35	0.000724077	0.0040823	0.994457	0.000736561
36	0.000699109	0.000112357	0.00033707	0.998851
37	0.994794	1.24841e-05	0.00454421	0.000649172
38	0.00484382	9.98727e-05	0.00364535	0.991411
39	0.995318	0.00406981	0.000249682	0.000362038
40	0.000461911	0.000237198	0.00513096	0.99417

## Sheet: prelig C3-bait
position	A	C	G	U
1	8.89521e-05	0.998436	0.000239251	0.00123613	C3
2	0.000981541	0.000417155	0.998353	0.000248453
3	6.44136e-05	0.000138029	0.000156433	0.999641
4	0.00025152	0.998703	8.28175e-05	0.000963137
5	0.999092	9.20195e-05	0.00020551	0.000610396
6	0.000800569	0.000343539	0.998298	0.000558251
7	0.99896	0.000542915	0.000141097	0.000355809
8	0.999083	0.000266856	0.000138029	0.000512242
9	7.66829e-05	0.000184039	0.000199375	0.99954
10	0.000864983	0.00107663	0.997473	0.000585857
11	0.000153366	0.99838	0.000272991	0.00119319
12	0.000131895	0.998755	4.9077e-05	0.00106436
13	0.000150298	0.00037728	2.14712e-05	0.999451
14	0.999061	0.000518376	0.000141097	0.000279126
15	0.00041102	0.998629	3.98751e-05	0.000920195
16	0.000177904	0.000230049	2.45385e-05	0.999568
17	5.21444e-05	0.000174837	8.28175e-05	0.99969
18	0.000460097	0.000131895	0.998923	0.000484636
19	0.996197	0.00308572	0.000558251	0.0001595
20	0.000665607	0.000141097	0.998635	0.000558251
21	0.139342	0.154979	0.515821	0.189858	N20
22	0.158991	0.168227	0.454076	0.218706
23	0.153455	0.172767	0.470569	0.20321
24	0.149268	0.17288	0.466974	0.210878
25	0.160614	0.170929	0.45223	0.216227
26	0.164304	0.163604	0.455331	0.216761
27	0.166755	0.158835	0.457732	0.216678
28	0.168629	0.157648	0.461401	0.212323
29	0.171027	0.154289	0.464177	0.210507
30	0.169233	0.150127	0.476918	0.203722
31	0.172573	0.142633	0.481642	0.203151
32	0.166966	0.138551	0.480532	0.213951
33	0.159148	0.135106	0.477237	0.228509
34	0.153154	0.124524	0.500396	0.221926
35	0.164617	0.118061	0.481943	0.23538
36	0.16085	0.115092	0.449647	0.274411
37	0.139664	0.150025	0.447797	0.262513
38	0.19417	0.0945163	0.51953	0.191784
39	0.0984516	0.12111	0.503794	0.276644
40	0.238171	0.203455	0.26024	0.298134

## Sheet: prelig prey-C4
position	A	C	G	U
1	0.301002	0.0875609	0.51308	0.0983573	N20
2	0.141565	0.324968	0.426692	0.106775
3	0.299966	0.113338	0.400232	0.186464
4	0.414308	0.0676919	0.285956	0.232045
5	0.36427	0.118745	0.339529	0.177457
6	0.307347	0.0920126	0.422611	0.17803
7	0.27792	0.110703	0.425961	0.185416
8	0.268324	0.124276	0.397248	0.210152
9	0.264237	0.137768	0.390603	0.207391
10	0.273168	0.125237	0.377145	0.22445
11	0.280495	0.115133	0.371264	0.233108
12	0.287582	0.115149	0.361155	0.236114
13	0.300462	0.117163	0.343271	0.239104
14	0.295623	0.118761	0.357996	0.22762
15	0.297358	0.124517	0.354701	0.223425
16	0.296758	0.125171	0.347472	0.230599
17	0.276365	0.134866	0.364772	0.223998
18	0.283975	0.126721	0.363402	0.225902
19	0.287593	0.128532	0.368907	0.214969
20	0.307331	0.104571	0.400074	0.188024
21	0.00615381	0.000583739	0.992046	0.00121658	C4
22	0.993955	1.0911e-05	0.00583194	0.000201854
23	0.00534094	0.000136388	0.991795	0.00272775
24	0.000338241	0.00252044	0.00349698	0.993644
25	0.000758316	0.991877	0.00279868	0.00456626
26	0.000796504	0.994495	0.000720127	0.00398798
27	0.00258591	0.995036	0.000512818	0.00186578
28	0.000714671	0.00324603	0.000174576	0.995865
29	0.000572828	0.000589195	0.00361155	0.995226
30	0.00487177	0.000223676	0.991997	0.00290778
31	0.00307145	0.991588	0.00340424	0.0019367
32	0.00042553	0.995194	0.000627383	0.00375339
33	0.99551	0.00184396	0.00026732	0.0023786
34	0.00204581	0.000387341	0.000687394	0.996879
35	0.00261319	0.00254772	0.993235	0.00160392
36	0.000430985	0.993492	0.00472447	0.00135297
37	0.996372	0.00320238	0.000360063	6.54661e-05
38	0.997305	0.000152754	0.00244407	9.81991e-05
39	0.000889248	0.997272	0.000512818	0.00132569
40	0.002575	0.00288596	0.994332	0.000207309
