# Supplementary material for: Random-sequence genetic oligomer pools display an innate potential for ligation and recombination
Source: eLife. 2018 Nov 21;7:e43022. doi: 10.7554/eLife.43022 (PMC6289569; doi:10.7554/eLife.43022)
Supplement: Figure 2—source data 1. — The file also contains the ligation kinetics of the other motifs used during fitting of the apparent rate constants shown in Figure 2—figure supplement 6. [file elife-43022-fig2-data1.xlsx]

## Sheet: panel C, D
This sheet contains the frequencies of all search Motifs in both C320-N20>p x OH-N20-C220 and C120-N20>p x OH-N20-C420 experiments. The data sets shown in panels C and D are indicated.
C320-N20>p x OH-N20-C220														panel D
Motif A		Motif B		Motif C		Motif D		Motif E		Motif F		Motif G		Motif H		Motif I		Motif J		Motif K		Motif L		Motif M		Motif N		Motif O		Motif P		Motif Q		Motif R		Motif S		Motif T		Motif U		Motif V		Motif W		Motif X		Motif Y
i	count	i	count	i	count	i	count	i	count	i	count	i	count	i	count	i	count	i	count	i	count	i	count	i	count	i	count	i	count	i	count	i	count	i	count	i	count	i	count	i	count	i	count	i	count	i	count	i	count
0	155272	0	63672	0	20446	0	9427	0	5706	0	9427	0	3089	0	1597	0	1787	0	785	0	983	0	465	0	397	0	220	0	289	0	99	0	4021	0	6436	0	3912	0	4059	0	2311	0	2851	0	2538	0	9055	0	2400
				1	20672	1	6662	1	6890	1	6662	1	3009	1	1166	1	1738	1	630	1	1015	1	287	1	464	1	136	1	225	1	71	1	3584	1	6526	1	4494	1	4219	1	2298	1	2702	1	1769	1	8161	1	1755
				2	17016	2	5357	2	7716	2	5357	2	3949	2	1077	2	1787	2	587	2	1007	2	266	2	520	2	117	2	304	2	57	2	4094	2	5885	2	3484	2	4278	2	2745	2	2975	2	1614	2	9076	2	1642
				3	31134	3	7431	3	6677	3	7431	3	4004	3	896	3	2130	3	475	3	1004	3	209	3	501	3	93	3	318	3	34	3	2736	3	4212	3	2557	3	2755	3	1798	3	2002			3	7233	3	1465
				4	19131	4	6984	4	5009	4	6984	4	2760	4	1257	4	1750	4	459	4	995	4	245	4	419	4	77	4	228	4	60	4	2166	4	3863	4	2062	4	2308	4	1363	4	1716			4	9523	4	1516
				5	23866	5	7811	5	5589	5	7811	5	2279	5	774	5	1313	5	456	5	859	5	214	5	446	5	92	5	215	5	57	5	2033	5	3521	5	2094	5	1753	5	949	5	1210
								6	9542			6	2650	6	1212	6	1170	6	422	6	718	6	226	6	404	6	95	6	233	6	57	6	2571	6	3369	6	1982	6	1715	6	799	6	876
												7	4492	7	1557	7	1505	7	692	7	601	7	194	7	323	7	83	7	212	7	33	7	3113	7	4500	7	1923	7	1832	7	810	7	791
																8	2427	8	894	8	798	8	295	8	324	8	60	8	185	8	39			8	5170	8	2690	8	1748	8	913	8	848
																				9	1223	9	379	9	398	9	125	9	170	9	28					9	3026	9	2549	9	851	9	978
																								10	632	10	191	10	207	10	62							10	2975	10	1288	10	999
																												11	357	11	65									11	1755	11	1376
																																										12	1701
C120-N20>p x OH-N20-C420																		panel C
Motif A		Motif B		Motif C		Motif D		Motif E		Motif F		Motif G		Motif H		Motif I		Motif J		Motif K		Motif L		Motif M		Motif N		Motif O		Motif P		Motif Q		Motif R		Motif S		Motif T		Motif U		Motif V		Motif W		Motif X		Motif Y
i	count	i	count	i	count	i	count	i	count	i	count	i	count	i	count	i	count	i	count	i	count	i	count	i	count	i	count	i	count	i	count	i	count	i	count	i	count	i	count	i	count	i	count	i	count	i	count	i	count
0	42252	0	32308	0	5100	0	2812	0	1511	0	1593	0	690	0	718	0	462	0	467	0	269	0	289	0	134	0	157	0	77	0	108	0	589	0	1223	0	761	0	815	0	574	0	580	0	2224	0	1580	0	989
				1	4510	1	2693	1	1065	1	1171	1	497	1	593	1	285	1	341	1	190	1	200	1	87	1	114	1	51	1	88	1	612	1	1262	1	717	1	720	1	423	1	480	1	731	1	1276	1	877
				2	2191	2	2239	2	972	2	1066	2	440	2	563	2	213	2	308	2	127	2	181	2	81	2	111	2	47	2	60	2	947	2	1228	2	759	2	815	2	467	2	477	2	766	2	1045	2	797
				3	4704	3	2868	3	912	3	1131	3	468	3	618	3	274	3	269	3	135	3	130	3	62	3	54	3	50	3	44	3	688	3	964	3	445	3	443	3	211	3	205			3	996	3	863
				4	3712	4	3587	4	679	4	727	4	387	4	559	4	231	4	533	4	124	4	166	4	73	4	84	4	40	4	50	4	514	4	986	4	597	4	605	4	311	4	305			4	1324	4	789
				5	3828	5	3821	5	895	5	952	5	286	5	382	5	194	5	259	5	132	5	161	5	59	5	94	5	26	5	47	5	594	5	844	5	698	5	609	5	368	5	423
								6	1465	6	1633	6	464	6	426	6	167	6	181	6	100	6	137	6	67	6	109	6	37	6	80	6	676	6	917	6	513	6	563	6	304	6	410
												7	737	7	994	7	256	7	223	7	82	7	81	7	63	7	93	7	32	7	71	7	932	7	1282	7	564	7	566	7	312	7	378
																8	454	8	595	8	119	8	132	8	56	8	56	8	28	8	56			8	1668	8	778	8	543	8	296	8	361
																				9	248	9	342	9	91	9	92	9	22	9	32					9	1015	9	761	9	375	9	400
																								10	127	10	251	10	45	10	54							10	968	10	434	10	425
																												11	94	11	199									11	573	11	501
																																										12	649

## Sheet: panel G, H
% ligation of minimal constructs under different conditions, panel G & H are indicated. The same data was used to obtain the best fit parameters shown in Figure 2-supplement 6
ice, +Mg		panel H	panel G
Time (days)	H4-splint-min	H4-min	J4-min	CCU-splint-min
0	0	0	0	0
1	4.35	0.06	3.13	4.35
2	7.53	0.15	4.46	7.45
8	15.5	0.2	6.54	22.45
13	22	0.18	6.18	29.56
22	29.69	0.18	5.32	34.14
17 °C, +Mg
	H4-splint	H4-2	J4	CCU-splint
0	0	0	0	0
1	0.73	0	2.04	0.67
2	1.45	0.1	4.21	1.83
3	2.42	0.11	4.45	1.99
5	3.52	0.07	6.72	5.11
8	6.25	0.11	8.44	7.15
13	8.89	0.16	10.13	13.08
22	14.61	0.06	11.59	20.76
super-cooled, +Mg
Time (days)	H4-splint	H4-2	J4	CCU-splint
0	0	0	0	0
1	0.03	0		0.06
2	0.03	0	0.24	0.08
3	0.06	0	0.3	0.07
5	0.09	0	0.44	0.14
8	0.18	0	0.61	0.21
13	0.24	0	0.83	0.23
22	0.24	0	1.36	0.33
ice, -Mg
Time (days)	H4-splint	H4-2	J4	CCU-splint
0	0	0	0	0
1	1.86	0.55	7.82	1.81
2	3.69	0.94	11.11	2.35
3	4.41	1.3	8.46	1.74
5	6.02			8.24
8	8.53	2.04	20.26	8.72
13	8.96	3.13	23.48	7.67
22	13.57	5.06	27.95	23
17 °C, -Mg	H4-splint	H4-2	J4	CCU-splint
0	0	0	0	0
3	0.02	0	0	0.03
22	0.4	0	0.09	0.43
