# Supplementary material for: Random-sequence genetic oligomer pools display an innate potential for ligation and recombination
Source: eLife. 2018 Nov 21;7:e43022. doi: 10.7554/eLife.43022 (PMC6289569; doi:10.7554/eLife.43022)
Supplement: Figure 4—figure supplement 2—source data 1. [file elife-43022-fig4-figsupp2-data1.xlsx]

## Sheet: Sheet1
cycle	-80, >p			-9, >p			-9,-p
	rep1	rep2	rep3	rep1	rep2	rep3	rep1	rep2	rep3
1	0	0	0	0	0.003818	0	0.008066	0.001494	0
2	0.002183	0.003079	0.001721	0	0	0.004556	0.008066	0.004482	0.002562
3	0.002183	0.007696	0.001721	0	0	0.009112	0.008066	0.004482	0.003842
4	0.004366	0.010775	0.005164	0.001361	0.003818	0.009112	0.003226	0.005976	0.003842
5	0.002183	0.010775	0.008606	0.002721	0.005728	0.013667	0.003226	0.005976	0.003842
6	0	0.010775	0.013769	0.002721	0.005728	0.015945	0.003226	0.005976	0.002562
7	0	0.013853	0.015491	0.008164	0.011455	0.018223	0.003226	0.002988	0.002562
8	0.002183	0.013853	0.015491	0.01905	0.017183	0.022779	0	0	0.003842
9	0.002183	0.015393	0.013769	0.032658	0.028638	0.038724	0.001613	0	0.005123
10	0.006549	0.015393	0.015491	0.059873	0.053458	0.063781	0.003226	0.004482	0.006404
11	0.006549	0.016932	0.017212	0.111581	0.106916	0.109339	0.008066	0.005976	0.010246
12	0.008732	0.016932	0.018933	0.189144	0.190921	0.186788	0.014519	0.013446	0.017931
13	0.019646	0.024628	0.027539	0.303447	0.309291	0.302961	0.03549	0.031375	0.034581
14	0.037109	0.04156	0.048193	0.440883	0.448664	0.441913	0.066141	0.059761	0.0666
15	0.072035	0.075423	0.080895	0.586483	0.593763	0.589977	0.124216	0.104582	0.120393
16	0.133155	0.130836	0.139415	0.715754	0.723589	0.726651	0.206489	0.182271	0.208766
17	0.224836	0.221652	0.230637	0.825975	0.822868	0.838269	0.324252	0.292829	0.320194
18	0.344894	0.346331	0.349398	0.896734	0.885872	0.904328	0.451694	0.418327	0.453394
19	0.482416	0.481786	0.480207	0.940278	0.922147	0.954442	0.587202	0.554283	0.589156
20	0.619937	0.61724	0.619621	0.964772	0.946966	0.981777	0.703352	0.676793	0.71083
21	0.739995	0.73884	0.738382	0.983822	0.964149	0.995444	0.801757	0.778386	0.803045
22	0.833859	0.835813	0.829604	0.991987	0.977514	1.00456	0.861445	0.844124	0.874769
23	0.890614	0.895844	0.898451	0.99879	0.990878	1.00911	0.908227	0.893426	0.917034
24	0.929905	0.935865	0.946644	1.00832	0.998515	1.00456	0.937265	0.924801	0.946492
25	0.951734	0.963571	0.975904	1.01648	1.00615	1.00456	0.964689	0.950199	0.969546
26	0.964831	0.983581	0.987952	1.01784	1.01188	1.00683	0.977595	0.962151	0.986196
27	0.977929	0.994356	1	1.0192	1.01761	1.00683	0.987274	0.981574	0.993881
28	0.988843	1.00051	1	1.02056	1.0157	1.01367	0.998566	0.98755	1.00541
29	0.991026	1.00821	1.00172	1.01648	1.01952	1.01822	1.00179	0.993526	1.00797
30	0.995392	1.01129	0.994836	1.0124	1.0157	1.01595	0.998566	0.99502	1.00925
31	1.00412	1.01283	1.00344	1.00968	1.00997	1.01595	1.00179	1.00548	1.00413
32	1.00194	1.00821	1.00516	1.00832	1.00424	1.01139	1.00663	1.001	1.00413
33	1.00631	1.01129	1.00344	1.00696	1.00615	1.00683	1.00179	0.999502	1.00157
34	1.00631	1.00359	1	1.00423	1.00424	1.00456	1.00179	0.996514	0.999004
35	1.00631	1.00051	1.00689	1.00423	1.00424	1.00228	1.00341	0.999502	0.999004
36	0.999757	0.995895	0.998279	1.00151	1.00042	0.997722	0.998566	0.999502	0.999004
37	0.999757	0.992817	0.996558	0.99879	0.998515	0.995444	0.99534	1.00398	0.997723
38	0.995392	0.991278	0.998279	0.994708	0.994697	0.995444	0.996953	1.00249	0.997723
39	0.993209	0.997435	0.998279	0.993347	0.994697	0.993166	0.996953	1.00249	1.00157
40	0.991026	0.998974	0.993115	0.987904	0.992787	0.993166	0.998566	0.99502	1.00029
