# Supplementary material for: Random-sequence genetic oligomer pools display an innate potential for ligation and recombination
Source: eLife. 2018 Nov 21;7:e43022. doi: 10.7554/eLife.43022 (PMC6289569; doi:10.7554/eLife.43022)
Supplement: Figure 4—figure supplement 3—source data 2. [file elife-43022-fig4-figsupp3-data2.xlsx]

## Sheet: panel B
Length of random element (Nmer) between C1 / C2 constant primer binding sites for the C120-N20-2'/3'OH x 5'ppp-N20-C220 experiment.
Nmer	#seqs
0	48222
1	80247
2	81483
3	98169
4	101605
5	121534
6	145699
7	173346
8	201151
9	225521
10	238605
11	275090
12	276411
13	260111
14	274119
15	252839
16	235759
17	239645
18	236437
19	232748
20	228069
21	234046
22	227978
23	223561
24	225732
25	223578
26	216489
27	213505
28	214872
29	212774
30	190868
31	168454
32	145583
33	115082
34	97114
35	69606
36	47878
37	30358
38	17988
39	15760
40	106299
41	1772
42	208
43	167
44	150
45	137
46	107
47	119
48	101
49	111
50	103
51	107
52	93
53	80
54	90
55	97
56	81
57	79
58	69
59	57
60	53
61	66
62	46
63	56
64	30
65	38
66	41
67	37
68	22
69	16
70	15
71	17
72	10
73	10
74	6
75	3
76	3
77	2
78	2
79	1
80	0
