# Supplementary material for: Random-sequence genetic oligomer pools display an innate potential for ligation and recombination
Source: eLife. 2018 Nov 21;7:e43022. doi: 10.7554/eLife.43022 (PMC6289569; doi:10.7554/eLife.43022)
Supplement: Figure 4—source data 1. [file elife-43022-fig4-data1.xlsx]

## Sheet: panel C
Length distribution of differerent C1-bait C2-prey srRNA products (Figure 4), unnormalized data
Nmer = Length of random region between C1 and C2
C1-bait>p x OH-prey-C2		C1-bait-p x OH-prey-C2		C1-bait x 5P-prey-C2		C1-bait x 5P-prey-C2
Nmer	# sequences	Nmer	# sequences	Nmer	# sequences	Nmer	# sequences
0	4049	0	18955	0	53923	0	36092
1	2853	1	13227	1	37590	1	24912
2	2089	2	11526	2	34413	2	23300
3	2393	3	13083	3	40286	3	28488
4	1964	4	12310	4	39287	4	28587
5	2112	5	12464	5	42212	5	31330
6	2404	6	14835	6	52814	6	40351
7	2479	7	15568	7	60264	7	46516
8	2838	8	17253	8	73964	8	58359
9	2860	9	17580	9	81911	9	64196
10	3262	10	21485	10	107761	10	83743
11	2986	11	23388	11	119747	11	93247
12	2820	12	30906	12	149628	12	111247
13	1050	13	12334	13	42770	13	30331
14	314	14	3822	14	9848	14	6515
15	92	15	1009	15	2458	15	1975
16	91	16	782	16	1089	16	458
17	168	17	608	17	651	17	466
18	251	18	1339	18	1299	18	615
19	349	19	8683	19	5642	19	442
20	1332	20	42930	20	46822	20	738
21	2120	21	108234	21	87225	21	832
22	2023	22	104324	22	89023	22	489
23	2135	23	106965	23	91304	23	463
24	1647	24	94498	24	75675	24	346
25	1498	25	82605	25	66428	25	267
26	1238	26	73569	26	61035	26	207
27	1183	27	70420	27	61757	27	175
28	1274	28	71077	28	66492	28	120
29	1396	29	70855	29	68446	29	99
30	1397	30	70566	30	69099	30	79
31	1438	31	70796	31	69721	31	68
32	1468	32	67014	32	65824	32	52
33	1584	33	64916	33	62295	33	29
34	1941	34	61903	34	60497	34	27
35	3024	35	59684	35	62610	35	21
36	6994	36	56755	36	68411	36	14
37	18528	37	55823	37	90565	37	16
38	49798	38	51133	38	143544	38	22
39	94023	39	55091	39	280585	39	14
40	1201813	40	27456	40	170830	40	49
41	25160	41	809	41	4686	41	1
42	407	42	74	42	202	42	0
43	102	43	65	43	99	43	0
44	65	44	56	44	94	44	0
45	64	45	52	45	67	45	0
46	62	46	46	46	61	46	1
47	43	47	61	47	36	47	0
48	23	48	44	48	40	48	0
49	22	49	37	49	27	49	0
50	24	50	44	50	40	50	0
