# Supplementary material for: Random-sequence genetic oligomer pools display an innate potential for ligation and recombination
Source: eLife. 2018 Nov 21;7:e43022. doi: 10.7554/eLife.43022 (PMC6289569; doi:10.7554/eLife.43022)
Supplement: Figure 5—figure supplement 1—source data 1. [file elife-43022-fig5-figsupp1-data1.xlsx]

## Sheet: panel C
Length distribution of naive N20A10 recombination products (band P1) using the protocol shown in Figure 5-supplement 1 A (no polyU tailing of products), unnormalized data
Nmer = Length of randomer after trimming. The 20mer peak presumably results from cleaved 2'-5' products during work-up and unligated species from the gel and was omitted from the plot.
Nmer	# sequences
15	6910
16	7688
17	7258
18	5452
19	6151
20	15476
21	1666
22	1438
23	678
24	920
25	1251
26	1605
27	3335
28	4214
29	5239
30	6023
31	6499
32	7409
33	7254
34	8020
35	6683
36	5117
37	3218
38	1888
39	755
40	316
41	83
42	31
43	14
44	16
45	19
46	18
47	15
48	13
49	11
50	17
51	5
56	1
59	3
60	1
61	1
64	1
65	1
66	1
67	2
69	1
71	1
74	1
77	1
91	1
99	2
103	1
106	1
107	2
109	1
110	1
111	1
112	2
113	1
114	5
115	6
116	5
117	6
118	5
119	3
120	1
121	1
122	4
124	1
126	1
