# Supplementary material for: Random-sequence genetic oligomer pools display an innate potential for ligation and recombination
Source: eLife. 2018 Nov 21;7:e43022. doi: 10.7554/eLife.43022 (PMC6289569; doi:10.7554/eLife.43022)
Supplement: Figure 6—figure supplement 1—source data 1. [file elife-43022-fig6-figsupp1-data1.xlsx]

## Sheet: panel A
Time (min)	Unhydrolysed randomers (%)
	RNA	atNA	HNA
0.1	100	100	100
0.5	81.1262
1.5	53.3193
3	33.4703	85.8747
9	3.7201	52.7798
27	0.346488	20.2269	97.8529
81		5.80168	98.5577
243		1.65967	96.3394
