# Supplementary material for: Random-sequence genetic oligomer pools display an innate potential for ligation and recombination
Source: eLife. 2018 Nov 21;7:e43022. doi: 10.7554/eLife.43022 (PMC6289569; doi:10.7554/eLife.43022)
Supplement: Figure 6—source data 1. [file elife-43022-fig6-data1.xlsx]

## Sheet: panel C
Length distribution of differerent srRNA (C1, C2) and srAtNA pools (Figure 4) after NaOH treatment and in-ice incubation, unnormalized data
Nmer = Length of random region between C1 and C2
srRNA, NaOH		srAtNA, NaOH
Nmer	# sequences	Nmer	# sequences
0	14	0	34
1	11	1	15
2	198	2	194
3	59	3	66
4	134	4	92
5	178	5	105
6	291	6	114
7	516	7	215
8	883	8	279
9	1351	9	342
10	1895	10	403
11	2721	11	581
12	3500	12	854
13	4766	13	1214
14	5997	14	1837
15	7394	15	3227
16	9390	16	5085
17	9522	17	7517
18	10690	18	11270
19	13454	19	17699
20	21481	20	27730
21	66496	21	41672
22	114118	22	51599
23	131808	23	57363
24	115032	24	56514
25	81257	25	53365
26	59155	26	50021
27	49074	27	47072
28	43804	28	47077
29	40275	29	45816
30	36794	30	44619
31	32381	31	43912
32	28823	32	40724
33	24767	33	38829
34	19626	34	32021
35	15922	35	26711
36	12069	36	19199
37	9187	37	13168
38	7527	38	7420
39	5885	39	4729
40	1062	40	2384
41	630	41	1424
42	355	42	724
43	206	43	353
44	169	44	245
45	148	45	165
46	126	46	94
47	87	47	64
48	90	48	46
49	101	49	36
50	99	50	19
51	105	51	13
52	93	52	8
53	112	53	7
54	91	54	5
55	88	55	1
56	94	56	3
57	70	57	0
58	69	58	1
59	87	59	1
60	57	60	0
61	76	61	2
62	83	62	0
63	76	63	1
64	86	64	0
65	70	65	1
66	59	66	0
67	43	67	1
68	24	68	1
69	29	69	0
70	28	70	1
71	17	71	1
72	22	72	0
73	13	73	0
74	21	74	0
75	11	75	1
76	11	76	0
77	7	77	0
78	7	78	0
79	9	79	0
80	4	80	0
81	7	81	0
82	2	82	0
83	5	83	0
84	5	84	0
85	3	85	0
86	3	86	0
87	1	87	0
88	1	88	0
89	5	89	0
90	0	90	0
91	0	91	0
92	0	92	0
93	1	93	0
94	0	94	0
95	0	95	0
96	0	96	0
97	0	97	0
98	0	98	0
99	0	99	0
100	0	100	0
